# Supplementary material
Source: Research Square preprint supplement (doi:10.21203/rs.3.rs-9879443/v1)
Supplement: Supplementary file 1 [file 9e2529739f172994c4c8ead1.xlsx]

## Sheet: Sheet1
Article title: The metazoan parasite infracommunities of flounders as indicators of environmental impact in the southern Gulf of Mexico: taxonomic and functional approaches, affiliation and e-mail address of the corresponding author
Journal name: Parasitology Research
Author names: Víctor M. Vidal-Martínez, Frank A. Ocaña, Lilia C. Soler-Jiménez, Jhonny G. García-Teh, Zita Paulette Arriaga Piñón, Ivan Velázquez-Abunader, Juan Roberto Vallarta-Zárate, Mario Vásquez-Ortíz, Jorge Montero Muñoz, Oscar Arturo Centeno-Chalé, M. Leopoldina Aguirre-Macedo
Affiliation of corresponding author: Laboratorio de Patología Acuática, Centro de Investigación y de Estudios Avanzados del Instituto Politécnico Nacional (CINVESTAV–IPN) Unidad Mérida, Carretera antigua a Progreso km 6, 97310 Mérida, Yucatán, México
e-mail of corresponding author: vvidal@cinvestav.mx
Online Resource 1
Codes for indidividual fish	Consecutive number of fish	Host species	Cruise ID	Latitude	Longitude	Sampling site	Parasite species
							Neoheterobothrium papillosum	Microcotyle sp.	Bucephalidae gen. sp.	Bulbocirrus sp.	Cryptogonimidae gen. sp.1	Cryptogonimidae gen. sp.2	Didymozoidae (Neotorticaecum-like)	Diplomonorchis caballeroi	Dollfustrema sp.	Gonocerca crassa	Helicometrina nimia	Lecithochirium floridense	Opecollidae gen. sp.	Prosorhynchus sp.	Rhipidocotyle sp.	Stephanostomum sp. 1	Stephanostomum sp. 2	Stephanostomum sp. 3	Stephanostomum sp. 4	Stephanostomum sp. 5	Stephanostomum sp. 6	Stephanostomum sp. 7	Dasyrhynchus sp.	Kotorella pronosoma	Kotorelliella sp.	Lacistorhynchus sp.	Lecanicephalum sp.	Nybelinia sp. 1	Nybelinia sp. 2	Nybelinia sp. 3	Nybelinia sp. 4	Nybelinia sp. 5	Onchoproteocephalidea gen. sp.	Oncomegas wageneri	Pterobothriidae gen. sp.	Tetraphyllidea gen. sp.	Trypanorhyncha fam. gen. sp.	Anisakidae gen. sp.	Anisakis sp.	Ascarididae	Capillariidae gen. sp.	Contracaecum sp.	Cucullanus sp.
Fishes from Campeche Sound (CS)
SO1	1	Syacium gunteri (S_gun)	C1	18.5587	-92.9244	E2	0	0	0	0	0	0	0	0	0	0	0	0	0	0	0	0	0	0	0	0	0	0	0	0	0	0	0	0	0	0	0	0	0	0	0	0	63	0	0	0	0	0	0
SO2	2	S_gun	C1	18.5587	-92.9244	E2	0	0	0	0	0	0	0	0	0	0	0	0	0	0	0	0	0	0	0	0	0	0	0	0	0	0	0	0	0	0	0	0	0	0	0	0	48	0	0	0	0	0	0
SO3	3	S_gun	C1	18.5587	-92.9244	E2	0	0	0	0	0	0	0	0	0	0	0	0	0	0	0	0	0	0	0	0	0	0	0	0	0	0	0	0	0	0	0	0	0	0	0	0	61	0	0	0	0	0	0
SO4	4	S_gun	C1	18.5587	-92.9244	E2	0	0	0	0	0	0	0	0	0	0	0	0	0	0	0	0	0	0	0	0	0	0	0	0	0	0	0	0	0	0	0	0	0	0	0	0	62	0	0	0	0	0	0
SO5	5	S_gun	C1	18.5587	-92.9244	E2	0	0	0	0	0	0	0	0	0	0	0	0	0	0	0	1	0	0	0	0	0	0	0	0	0	0	0	0	0	0	0	0	0	0	0	0	152	0	0	0	0	0	0
SO6	6	S_gun	C1	18.5587	-92.9244	E2	0	0	0	0	0	0	0	0	0	0	0	0	0	0	0	0	0	0	0	0	0	0	0	0	0	0	0	0	0	0	0	0	0	0	0	0	58	0	0	0	0	0	0
SO7	7	S_gun	C1	18.5587	-92.9244	E2	0	0	0	0	0	0	0	0	0	0	0	0	0	0	0	4	0	0	0	0	0	0	0	0	0	0	0	0	0	0	0	0	0	0	0	0	71	0	0	0	0	0	0
SO8	8	S_gun	C1	18.5587	-92.9244	E2	0	0	0	0	0	0	0	0	0	0	0	0	0	0	0	0	0	0	0	0	0	0	0	0	0	0	0	0	0	0	0	0	0	0	0	0	89	0	0	0	0	0	0
SO9	9	S_gun	C1	18.5587	-92.9244	E2	0	0	0	0	0	0	0	0	0	0	0	0	0	0	0	0	0	0	0	0	0	0	0	0	0	0	0	0	0	0	0	0	0	0	0	0	134	0	0	0	0	0	0
SO10	10	S_gun	C1	18.5587	-92.9244	E2	0	0	0	0	0	0	0	0	0	0	0	0	0	0	0	0	0	0	0	0	0	0	0	0	0	0	0	0	0	0	0	0	0	0	0	0	74	0	0	0	0	0	0
SO11	11	S_gun	C2	18.5587	-92.9244	E2	0	0	0	0	0	0	0	0	0	0	0	0	0	0	0	0	0	0	0	0	0	0	0	0	0	0	0	0	0	0	0	0	0	0	0	0	101	0	0	0	0	6	0
SO12	12	S_gun	C2	18.5587	-92.9244	E2	0	0	0	0	0	0	0	0	0	0	0	0	0	0	0	0	0	0	0	0	0	0	0	0	0	0	0	0	0	0	0	0	0	0	0	0	97	0	0	0	0	14	0
SO13	13	S_gun	C2	18.5587	-92.9244	E2	0	0	0	0	0	0	0	0	0	0	0	0	0	0	0	0	0	0	0	0	0	0	0	0	0	0	0	0	0	0	0	0	0	0	0	0	173	0	0	0	0	5	0
SO14	14	S_gun	C2	18.5587	-92.9244	E2	0	0	0	0	0	0	0	0	0	0	0	0	0	0	0	0	0	0	0	0	0	0	0	0	0	0	0	0	0	0	0	0	0	0	0	0	69	0	0	0	0	5	0
SO15	15	S_gun	C2	18.6919	-92.812	E4	0	0	0	0	0	0	0	0	0	0	0	0	0	0	0	0	0	0	0	0	0	0	0	0	0	0	0	0	0	0	0	0	0	0	0	0	12	0	0	0	0	6	0
SO16	16	S_gun	C2	18.6919	-92.812	E4	0	0	0	0	0	0	0	0	0	0	0	0	0	0	0	0	0	0	0	0	0	0	0	0	0	0	0	0	0	0	0	0	0	0	0	0	5	0	0	0	0	1	0
SO17	17	S_gun	C2	18.6919	-92.812	E4	0	0	0	0	0	0	0	0	0	0	0	0	0	0	0	0	0	0	0	0	0	0	0	0	0	0	0	0	0	0	0	0	0	0	0	0	27	0	0	0	0	0	0
SO18	18	S_gun	C2	18.6919	-92.812	E4	0	0	0	0	0	0	0	0	0	0	0	1	0	0	0	11	0	0	0	0	0	0	0	0	0	0	0	0	0	0	0	0	0	0	0	0	79	0	0	0	0	15	0
SO19	19	S_gun	C2	18.6919	-92.812	E4	0	0	0	0	0	0	0	0	0	0	0	0	0	0	0	0	0	0	0	0	0	0	0	0	0	0	0	0	0	0	0	0	0	0	0	0	66	0	0	0	0	9	0
SO20	20	S_gun	C2	18.6919	-92.812	E4	0	0	0	0	0	0	0	0	0	0	0	0	0	0	0	1	0	0	0	0	0	0	0	0	0	0	0	0	0	0	0	0	0	0	0	0	11	0	0	0	0	10	0
SO21	21	S_gun	C2	18.6919	-92.812	E4	0	0	0	0	0	0	0	0	0	0	0	0	0	0	0	0	0	0	0	0	0	0	0	0	0	0	0	0	0	0	0	0	0	0	0	0	12	0	0	0	0	0	0
SO22	22	S_gun	C2	18.6919	-92.812	E4	0	0	0	0	0	0	0	0	0	0	0	0	0	0	0	1	0	0	0	0	0	0	0	0	0	0	1	0	0	0	0	0	0	0	0	0	19	0	0	0	0	6	0
SO23	23	S_gun	C2	18.6919	-92.812	E4	0	0	0	0	0	0	0	0	0	0	0	0	0	0	0	1	0	0	0	0	0	0	0	0	0	0	0	0	0	0	0	0	0	0	0	0	14	0	0	0	0	8	0
SO24	24	S_gun	C2	18.6919	-92.812	E4	0	0	0	0	0	0	0	0	0	0	0	0	0	0	0	0	0	0	0	0	0	0	0	0	0	0	0	0	0	0	0	0	0	0	0	0	68	0	0	0	0	3	0
SO25	25	S_gun	C2	18.6919	-92.812	E4	0	0	0	0	0	0	0	0	0	0	0	0	0	0	0	2	0	0	0	0	0	0	0	0	0	0	0	0	0	0	0	0	0	0	0	0	47	0	0	0	0	8	0
SO26	26	S_gun	C2	18.6412	-92.6261	E10	0	0	0	0	0	0	0	0	0	0	0	0	0	0	0	0	0	0	0	0	0	0	0	0	0	0	0	0	0	0	0	0	0	0	0	0	0	0	0	0	0	5	0
SO27	27	S_gun	C2	18.6412	-92.6261	E10	0	0	0	0	0	0	0	0	0	0	0	0	0	0	0	0	0	0	0	0	0	0	0	0	0	0	0	0	0	0	0	0	0	0	0	0	0	0	0	0	0	16	0
SO28	28	S_gun	C2	18.6412	-92.6261	E10	0	0	0	0	0	0	0	0	0	0	0	0	0	0	0	0	0	0	0	0	0	0	0	0	0	0	0	0	0	0	0	0	0	0	0	0	0	0	0	0	0	7	0
SO29	29	S_gun	C2	18.6919	-92.6574	E11	0	0	0	0	0	0	0	0	0	0	0	0	0	0	0	0	0	0	0	0	0	0	0	0	0	0	0	0	0	0	0	0	0	0	0	0	51	0	0	0	0	5	0
SO30	30	S_gun	C2	18.6919	-92.6574	E11	0	0	0	0	0	0	0	0	0	0	0	0	0	0	0	0	0	0	0	0	0	0	0	0	0	0	0	0	0	0	0	0	0	0	0	0	0	0	0	0	0	11	0
SO31	31	S_gun	C2	18.6919	-92.6574	E11	0	0	0	0	0	0	0	0	0	0	0	0	0	0	0	0	0	0	0	0	0	0	0	0	0	0	0	0	0	0	0	0	0	0	0	0	0	0	0	0	0	3	0
SO32	32	S_gun	C2	18.6919	-92.6574	E11	0	0	0	0	0	0	0	0	0	0	0	0	0	0	0	0	0	0	0	0	0	0	0	0	0	0	0	0	0	0	0	0	0	0	0	0	4	0	0	0	0	10	0
SO33	33	S_gun	C2	18.6919	-92.6574	E11	0	0	0	0	0	0	0	0	0	0	0	0	0	0	0	0	0	0	0	0	0	0	0	0	0	0	0	0	0	0	0	0	0	0	0	0	2	0	0	0	0	7	0
SO34	34	S_gun	C2	18.6919	-92.6574	E11	0	0	0	0	0	0	0	0	0	0	0	0	0	0	0	2	0	0	0	0	0	0	0	0	0	0	0	0	0	0	0	0	0	0	0	0	0	0	0	0	0	2	0
SO35	35	S_gun	C2	18.6919	-92.6574	E11	0	0	0	0	0	0	0	0	0	0	0	0	0	0	0	1	0	0	0	0	0	0	0	0	0	0	0	0	0	0	0	0	0	0	0	0	0	0	0	0	0	0	0
SO36	36	S_gun	C2	18.6919	-92.6574	E11	0	0	0	0	0	0	0	0	0	0	0	0	0	0	0	0	0	0	0	0	0	0	0	0	0	0	0	0	0	0	0	0	0	0	0	0	8	0	0	0	0	1	0
SO37	37	S_gun	C2	18.6919	-92.6574	E11	0	0	0	0	0	0	0	0	0	0	0	0	0	0	0	0	0	0	0	0	0	0	0	0	0	0	0	0	0	0	0	0	0	0	0	0	17	0	0	0	0	0	0
SO38	38	S_gun	C2	18.6919	-92.6574	E11	0	0	0	0	0	0	0	0	0	0	0	0	0	0	0	10	0	0	0	0	0	0	0	0	0	0	0	0	0	0	0	0	0	0	0	0	3	0	0	0	0	2	0
SO39	39	S_gun	C2	18.6919	-92.6574	E11	0	0	0	0	0	0	0	0	0	0	0	0	0	0	0	5	0	0	0	0	0	0	0	0	0	0	5	0	0	0	0	0	0	0	0	0	0	0	0	0	0	1	0
SO40	40	S_gun	C2	18.6843	-92.3904	E15	0	0	0	0	0	0	0	0	0	0	0	0	0	0	0	0	0	0	0	0	0	0	0	0	0	0	0	0	0	0	0	0	0	0	0	18	15	0	0	0	0	28	0
SO41	41	S_gun	C2	18.6843	-92.3904	E15	0	0	0	0	0	0	0	0	0	0	0	0	0	0	0	0	0	0	0	0	0	0	0	0	0	0	0	0	0	0	0	0	0	0	0	0	70	0	0	0	0	7	0
SO42	42	S_gun	C2	18.711	-92.4607	E16	0	0	0	0	0	0	0	0	0	0	0	0	0	0	0	0	0	0	0	0	0	0	0	0	0	0	0	0	0	0	0	0	0	0	0	0	0	0	0	0	0	9	0
SO43	43	S_gun	C2	18.711	-92.4607	E16	0	0	0	0	0	0	0	0	0	0	0	0	0	0	0	0	0	0	0	0	0	0	0	0	0	0	0	0	0	0	0	0	0	0	0	0	7	0	0	0	0	6	0
SO44	44	S_gun	C2	18.711	-92.4607	E16	0	0	0	0	0	0	0	0	0	0	0	0	0	0	0	0	0	0	0	0	0	0	0	0	0	0	0	0	0	0	0	0	0	0	0	0	21	0	0	0	0	10	0
SO45	45	S_gun	C2	18.711	-92.4607	E16	0	0	0	0	0	0	0	0	0	0	0	0	0	0	0	1	0	0	0	0	0	0	0	0	0	0	0	0	0	0	0	0	0	0	0	0	3	0	0	0	0	17	0
SO46	46	S_gun	C2	18.4831	-92.9869	E21	0	0	0	0	0	0	0	0	0	0	0	0	0	0	0	0	0	0	0	0	0	0	0	0	0	0	0	0	0	0	0	0	0	0	0	0	0	0	0	0	0	25	0
SO47	47	S_gun	C2	18.4831	-92.9869	E21	0	0	0	0	0	0	0	0	0	0	0	0	0	0	0	0	0	0	0	0	0	0	0	0	0	0	0	0	0	0	0	0	0	0	0	0	0	0	0	0	0	27	0
SO48	48	S_gun	C2	18.4831	-92.9869	E21	0	0	0	0	0	0	0	0	0	0	0	0	0	0	0	0	0	0	0	0	0	0	0	0	0	0	0	0	0	0	0	0	0	0	0	0	0	0	0	0	0	15	0
SO49	49	S_gun	C3	20.777	-92.0872	A3	0	0	0	0	0	0	14	0	28	0	0	639	0	0	0	0	21	0	0	0	0	0	0	16	136	0	0	0	0	0	0	0	0	0	0	22	0	0	0	0	0	0	0
SO50	50	Syacium papillosum (S_pap)	C3	20.777	-92.0872	A3	0	0	0	0	0	0	0	0	0	0	0	0	0	0	0	0	0	0	0	0	0	0	0	21	0	0	18	0	0	0	0	0	0	0	0	22	0	0	0	0	0	0	0
SO51	51	S_pap	C3	20.777	-92.0872	A3	0	0	0	0	46	0	7	0	0	0	0	18	0	0	0	0	26	0	0	0	0	0	0	315	0	0	647	0	0	0	0	0	0	0	0	7	0	15	0	0	0	0	0
SO52	52	S_pap	C4	20.777	-92.0872	A3	0	0	0	0	10	0	3	0	0	0	0	30	0	0	0	0	2	0	0	0	0	0	0	61	0	0	98	0	0	0	0	0	0	0	0	0	0	14	0	0	0	0	0
SO53	53	S_pap	C4	20.777	-92.0872	A3	0	0	0	0	17	0	0	0	0	0	0	793	0	0	0	0	2	0	0	0	0	0	0	0	0	0	0	0	0	0	0	0	0	0	0	37	0	0	0	0	0	0	0
SO54	54	S_pap	C4	20.777	-92.0872	A3	0	0	0	0	9	281	0	0	0	0	0	4	0	0	0	65	7	0	0	8	0	0	0	54	0	0	51	1	1	0	0	0	0	0	0	0	0	0	0	0	0	0	0
SO55	55	S_gun	C5	20.777	-92.0872	A3	0	0	0	0	2	0	0	0	0	0	0	10	0	0	0	0	2	0	0	0	0	0	0	3	0	0	30	0	0	0	0	0	0	0	0	0	0	0	0	0	0	0	0
SO56	56	S_gun	C5	20.777	-92.0872	A3	0	0	0	0	0	0	0	0	0	0	0	2	0	0	0	0	13	0	0	14	0	0	0	0	0	0	0	0	0	0	0	0	0	0	0	0	0	0	0	0	0	0	0
SO57	57	S_gun	C5	20.777	-92.0872	A3	0	0	0	0	8	1	0	0	0	0	0	2	0	0	0	2	2	0	0	0	0	0	0	0	0	0	0	0	0	0	0	0	0	0	0	0	0	0	0	0	0	0	0
SO58	58	S_gun	C6	20.777	-92.0872	A3	0	0	0	0	18	0	0	0	0	0	0	2	0	0	0	0	0	0	0	1	0	0	0	21	0	0	0	0	0	0	0	0	0	0	0	1	0	0	0	0	0	0	0
SO59	59	S_gun	C6	20.777	-92.0872	A3	0	0	0	0	0	0	0	0	0	0	0	2	0	0	0	0	0	0	0	0	0	0	0	19	0	0	25	0	0	1	0	0	0	0	0	0	0	0	0	0	0	0	0
SO60	60	S_gun	C6	20.777	-92.0872	A3	0	0	0	0	10	1	0	0	0	0	0	6	0	0	0	0	0	0	0	1	0	0	0	1	0	0	34	0	0	0	0	0	0	0	0	0	0	0	0	0	0	0	0
SO61	61	S_gun	C6	20.777	-92.0872	A3	0	0	0	0	1	0	0	0	0	0	0	1	0	0	0	0	0	1	0	0	0	0	0	14	0	0	1	0	0	0	0	0	0	0	0	0	0	0	0	0	0	0	0
SO62	62	S_pap	C12	20.777	-92.0872	A3	0	0	0	0	0	0	0	0	0	0	0	0	0	0	0	0	0	0	0	0	0	0	0	12	0	0	9	0	2	0	0	0	0	0	0	0	0	0	0	0	0	0	0
SO63	63	S_pap	C12	20.777	-92.0872	A3	0	0	0	0	0	0	1	0	0	0	0	0	0	0	0	0	0	3	0	0	0	0	0	44	0	0	23	0	3	0	0	0	0	0	0	0	0	0	0	0	0	0	0
SO64	64	S_pap	C12	20.777	-92.0872	A3	0	0	0	0	0	0	0	0	0	0	0	3	0	0	0	0	0	2	0	0	0	0	0	28	0	0	0	0	3	0	0	0	0	0	0	0	0	0	0	0	0	0	0
SO65	65	S_pap	C3	20.777	-92.4391	A4	0	0	0	0	0	0	0	0	0	0	0	1	0	0	0	0	22	0	0	0	0	0	0	26	0	0	117	0	0	0	0	0	0	0	0	0	0	0	0	0	0	0	0
SO66	66	S_pap	C3	20.777	-92.4391	A4	0	0	0	0	0	0	0	0	0	0	0	9	0	0	0	0	0	9	0	0	0	0	0	0	0	0	6	0	0	0	0	0	0	0	0	0	0	0	0	0	0	0	1
SO67	67	S_pap	C6	20.777	-92.4391	A4	0	0	0	0	0	0	1	0	0	0	0	0	0	0	0	0	0	0	0	0	0	0	0	0	0	0	119	0	0	16	0	0	0	0	0	0	0	0	0	0	0	0	3
SO68	68	S_pap	C6	20.777	-92.4391	A4	0	0	0	0	0	0	0	0	0	0	0	1	0	0	1	0	0	0	0	0	0	0	0	2	0	0	5	0	0	0	0	0	0	0	0	0	0	0	0	0	0	0	1
SO69	69	S_pap	C6	20.777	-92.4391	A4	0	0	0	0	11	0	0	0	0	0	0	2	1	0	0	0	0	0	0	0	0	0	0	19	0	0	127	0	0	0	0	0	0	0	0	0	0	0	0	0	0	0	1
SO70	70	S_pap	C6	20.777	-92.4391	A4	0	0	0	0	0	0	0	0	0	0	0	2	0	0	0	0	9	0	1	0	0	0	0	26	0	0	255	0	0	0	0	0	0	0	0	0	0	0	0	0	0	0	10
SO71	71	S_pap	C6	20.777	-92.4391	A4	0	0	0	0	37	0	0	0	0	0	0	7	0	0	0	0	0	0	7	16	0	0	0	4	0	0	41	0	0	1	0	0	0	0	0	8	0	0	0	0	0	0	6
SO72	72	S_pap	C6	20.777	-92.4391	A4	0	0	0	0	7	0	0	0	0	0	0	15	0	0	0	1	0	0	0	1	0	0	0	2	0	0	203	0	0	0	0	0	0	0	0	3	0	0	0	0	0	0	0
SO73	73	S_pap	C6	20.777	-92.4391	A4	0	0	0	0	0	0	0	0	0	0	0	0	0	0	0	0	0	0	20	0	0	0	0	3	0	0	190	0	0	0	0	0	0	0	0	0	0	0	0	0	0	0	3
SO74	74	S_pap	C6	20.777	-92.4391	A4	0	0	0	0	33	0	0	0	0	0	0	11	1	0	0	0	19	0	0	0	0	0	0	9	0	0	71	0	0	0	0	0	0	0	0	23	0	0	0	0	0	0	4
SO75	75	S_pap	C6	20.777	-92.4391	A4	0	0	0	0	0	0	0	0	0	0	0	2	0	0	0	0	1	0	16	0	0	0	0	10	0	0	65	0	0	1	0	0	0	0	0	0	0	0	0	0	0	0	7
SO76	76	S_pap	C6	20.777	-92.4391	A4	0	0	0	0	0	0	0	0	0	0	0	32	0	0	0	0	0	0	2	10	0	0	0	0	0	0	262	0	0	0	0	0	0	0	0	0	0	1	0	0	0	0	0
SO77	77	S_pap	C3	20.777	-92.4603	A5	0	0	0	0	0	0	2	0	0	0	0	1	0	0	0	0	1	4	0	0	0	0	0	13	0	0	54	0	0	0	0	0	0	0	0	0	0	0	0	0	0	0	1
SO78	78	S_pap	C3	20.777	-92.4603	A5	0	0	0	0	1	0	0	0	0	0	0	4	0	0	0	0	7	0	0	0	0	0	0	57	0	0	228	0	0	0	0	0	0	0	0	0	0	0	0	0	0	0	0
SO79	79	S_pap	C5	20.777	-92.4603	A5	0	0	0	0	0	0	0	0	0	0	0	4	0	0	0	1	3	0	0	0	0	0	0	3	0	0	34	0	0	0	0	0	0	0	0	0	0	0	0	0	0	0	0
SO80	80	S_pap	C5	20.777	-92.4603	A5	0	0	0	0	0	0	0	0	0	0	0	0	0	0	0	1	27	0	12	16	0	0	0	1	0	0	25	0	0	0	0	0	0	0	0	0	0	0	0	0	0	0	1
SO81	81	S_pap	C5	20.777	-92.4603	A5	0	0	0	0	0	0	0	0	0	0	0	4	0	0	0	0	2	0	0	0	0	0	0	0	0	0	286	0	0	0	0	0	0	0	0	0	0	0	0	0	0	0	2
SO82	82	S_pap	C5	20.777	-92.4603	A5	0	0	0	0	0	0	0	0	0	0	0	0	0	0	0	0	0	0	0	0	0	0	0	0	0	0	0	0	7	0	0	0	0	0	0	0	0	0	0	0	0	0	6
SO83	83	S_pap	C5	20.777	-92.4603	A5	0	0	0	0	0	0	0	0	0	0	0	3	0	0	0	8	12	0	1	0	0	0	0	42	0	0	151	0	0	0	0	0	0	0	0	0	0	0	0	0	0	0	1
SO84	84	S_pap	C6	20.777	-92.4603	A5	0	0	0	0	14	0	1	0	0	0	0	8	0	0	0	0	0	0	5	0	79	0	0	32	0	0	0	0	0	0	0	0	0	0	0	0	0	0	0	0	0	0	2
SO85	85	S_pap	C6	20.777	-92.4603	A5	0	0	0	0	1	0	0	0	0	0	0	0	0	0	0	0	34	0	0	2	0	0	0	111	0	0	97	1	0	1	0	0	0	0	0	0	0	0	0	0	0	0	3
SO86	86	S_pap	C6	20.777	-92.4603	A5	0	0	0	1	0	0	0	0	0	0	0	0	0	0	0	0	0	0	1	0	0	0	0	8	0	0	8	0	0	0	0	0	0	0	0	0	0	3	0	0	0	0	0
SO87	87	S_pap	C6	20.777	-92.4603	A5	0	0	0	2	2	0	0	0	0	0	0	2	0	0	0	1	27	0	0	2	0	1	0	45	0	0	166	0	0	0	0	0	0	0	0	0	0	0	0	0	0	0	0
SO88	88	S_pap	C6	20.777	-92.4603	A5	0	0	0	3	1	0	0	0	0	0	0	6	1	0	0	0	3	0	0	0	0	0	0	26	0	0	142	0	0	1	0	0	0	0	0	0	0	0	0	0	0	0	1
SO89	89	S_pap	C12	20.777	-92.4603	A5	0	0	0	0	0	0	0	0	0	0	0	0	0	0	0	0	3	0	0	0	0	0	0	2	0	0	0	0	0	0	0	0	0	0	0	0	0	0	0	0	0	0	0
SO90	90	S_pap	C12	19.3128	-92.756	A7	0	0	0	0	0	0	1	0	0	0	0	1	0	0	0	2	0	0	0	0	0	0	0	0	0	0	39	12	0	0	0	0	0	0	0	0	0	0	0	0	0	0	0
SO91	91	S_pap	C3	20.9557	-90.7106	B6	0	0	0	0	0	0	0	0	0	0	0	5	0	0	0	0	0	0	0	0	0	0	0	10	0	0	0	0	0	1	0	0	0	0	0	0	0	0	0	0	0	0	0
SO92	92	S_gun	C3	21.1858	-91.9316	B8	0	0	0	0	2	0	0	0	0	0	0	8	0	0	0	10	0	0	0	0	0	0	0	12	0	0	132	0	0	0	0	0	0	0	0	0	0	0	0	0	0	0	0
SO93	93	S_pap	C3	21.1858	-91.9316	B8	0	0	0	0	0	0	0	0	0	0	0	14	0	0	0	0	101	0	1	88	0	0	0	0	0	0	55	0	2	0	0	0	0	0	0	0	0	0	0	0	0	0	0
SO94	94	S_gun	C3	21.1858	-91.9316	B8	0	0	0	0	2	0	0	0	0	0	0	0	0	0	0	62	1	0	0	0	0	0	0	36	0	0	75	0	1	1	0	0	0	0	0	0	0	0	0	0	0	0	0
SO95	95	S_pap	C3	21.1858	-91.9316	B8	0	0	0	0	10	4	0	0	0	0	0	15	0	0	0	7	0	0	3	8	0	0	0	21	0	0	122	0	0	0	0	0	0	0	0	1	0	0	0	0	0	0	0
SO96	96	S_pap	C3	21.1858	-91.9316	B8	0	0	0	0	0	0	0	0	0	0	0	3	0	0	0	27	0	0	1	1	0	0	0	0	0	0	56	0	0	0	0	0	0	0	0	0	0	0	0	0	0	0	0
SO97	97	S_pap	C5	21.1858	-91.9316	B8	0	0	0	0	5	0	0	0	0	0	0	45	0	0	0	0	1	0	1	0	0	0	0	6	0	0	86	0	0	1	0	0	0	0	0	0	0	0	0	0	0	0	0
SO98	98	S_pap	C5	21.1858	-91.9316	B8	0	0	0	0	0	0	0	0	0	0	0	53	0	0	0	0	0	0	0	0	0	0	0	0	0	0	56	0	1	0	0	0	0	0	0	0	0	0	0	0	0	0	0
SO99	99	S_pap	C5	21.1858	-91.9316	B8	0	0	0	0	0	0	0	0	0	0	0	7	0	0	0	0	4	1	0	0	0	0	0	49	0	0	156	0	0	0	0	0	0	0	0	0	0	0	0	0	0	0	0
SO100	100	S_pap	C5	21.1858	-91.9316	B8	0	0	0	0	4	0	0	0	0	0	0	12	0	0	0	0	0	0	0	0	0	0	0	10	0	0	81	0	0	2	0	0	0	0	0	0	0	0	0	0	0	0	0
SO101	101	S_pap	C5	21.1858	-91.9316	B8	0	0	0	0	0	0	0	0	0	0	0	1	0	0	0	0	0	0	0	0	0	0	0	3	0	0	181	0	1	0	0	0	0	0	0	0	0	56	0	0	0	0	0
SO102	102	S_pap	C6	21.1858	-91.9316	B8	0	0	0	0	4	2	1	0	0	0	0	195	0	0	0	0	0	0	0	0	0	0	0	0	0	0	18	0	0	0	0	1	0	0	0	109	0	0	0	0	6	0	0
SO103	103	S_pap	C6	21.1858	-91.9316	B8	0	0	0	0	107	0	0	0	0	0	0	352	0	0	0	23	1	0	0	4	0	0	0	75	0	0	209	0	0	0	0	0	0	0	0	0	0	0	0	0	1	0	0
SO104	104	S_pap	C6	21.1858	-91.9316	B8	0	0	0	0	1	0	0	0	0	0	0	83	0	0	0	2	2	0	0	0	0	0	0	0	0	0	116	0	0	3	2	0	0	0	0	2	0	3	0	0	0	0	0
SO105	105	S_pap	C6	21.1858	-91.9316	B8	0	0	0	0	12	0	0	0	0	0	0	95	0	0	0	0	0	0	0	0	0	0	0	14	0	0	35	0	0	1	0	1	0	0	0	2	0	0	0	0	0	0	0
SO106	106	S_pap	C6	21.1858	-91.9316	B8	0	0	0	0	78	0	0	0	0	0	0	35	0	0	0	1	0	0	5	0	0	2	0	32	0	0	0	0	0	0	1	0	0	0	0	16	0	0	0	0	0	0	0
SO107	107	S_pap	C6	21.1858	-91.9316	B8	0	0	0	0	1	0	0	0	0	0	0	18	0	0	0	1	1	0	0	0	0	2	0	9	0	0	41	0	0	0	0	1	0	0	0	1	0	0	0	0	0	0	0
SO108	108	S_pap	C6	21.1858	-91.9316	B8	0	0	0	0	4	0	0	0	0	0	0	6	0	0	0	0	0	0	0	0	0	0	0	6	0	0	20	0	0	0	0	0	0	0	0	0	0	0	0	0	0	0	0
SO109	109	S_pap	C6	21.1858	-91.9316	B8	0	0	0	0	4	0	0	0	0	0	0	23	0	0	0	0	0	0	0	0	0	0	0	17	0	0	108	0	0	5	0	0	0	0	0	0	0	0	0	0	0	0	0
SO110	110	S_pap	C3	21.2644	-92.3879	B10	0	0	0	0	0	0	0	0	0	0	0	2	0	0	0	0	0	0	13	78	0	0	0	8	0	0	97	0	0	0	0	0	0	0	0	0	0	0	0	0	0	0	0
SO111	111	S_pap	C3	21.2644	-92.3879	B10	0	0	0	0	0	0	0	0	0	0	0	4	0	0	0	0	15	5	0	0	0	0	0	27	0	0	17	0	0	2	0	0	0	0	0	0	0	0	0	0	0	0	0
SO112	112	S_pap	C3	21.2644	-92.3879	B10	0	0	0	0	0	0	0	0	0	0	0	0	0	0	0	0	0	0	8	41	0	0	0	63	0	0	193	0	0	0	0	0	0	0	0	0	0	0	0	0	0	0	0
SO113	113	S_pap	C13	18.2984	-93.8499	L B Carmen	0	0	0	0	0	0	0	0	0	0	0	2	0	0	0	13	0	0	0	0	0	0	0	14	0	0	165	0	0	0	0	0	0	0	0	2	0	6	0	0	0	0	0
SO114	114	S_pap	C13	18.2984	-93.8499	L B Carmen	0	0	0	0	0	0	0	0	0	0	0	0	0	0	0	34	0	0	0	0	0	0	0	46	0	0	46	0	0	0	0	0	0	0	0	0	0	0	0	0	0	0	0
SO115	115	S_pap	C13	18.2984	-93.8499	L B Carmen	0	0	0	0	0	0	0	0	0	0	0	11	0	0	0	31	0	0	0	0	0	0	0	8	0	0	2004	0	0	0	0	0	0	1	0	1	0	0	0	0	0	0	0
SO116	116	S_pap	C13	18.2984	-93.8499	L B Carmen	0	0	0	0	0	0	0	0	0	0	0	7	0	0	0	27	2	0	0	0	0	0	0	24	0	0	132	0	0	0	0	0	0	0	0	1	0	0	0	0	0	0	0
SO117	117	S_pap	C13	18.2984	-93.8499	L B Carmen	0	0	0	0	0	0	0	0	0	0	0	2	0	0	0	18	0	0	0	0	0	0	0	26	0	0	202	0	0	0	0	0	0	0	0	0	0	2	0	0	0	0	0
SO118	118	S_gun	C13	18.188	-94.375	59_4 Salino	0	0	0	0	0	0	0	0	0	0	0	1	0	0	0	256	0	0	0	0	0	0	0	0	0	0	0	0	0	0	0	0	0	0	0	0	0	8	0	0	0	0	0
SO119	119	S_pap	C13	18.188	-94.375	59_4 Salino	0	0	0	0	0	0	0	0	0	0	0	0	0	0	0	31	0	0	0	0	0	0	0	21	0	0	89	0	0	0	0	0	0	0	0	0	0	0	0	0	0	0	0
SO120	120	S_pap	C13	18.188	-94.375	59_4 Salino	0	0	0	0	0	0	0	0	0	0	0	0	0	0	0	9	0	0	0	0	0	0	0	10	0	0	158	0	0	0	0	0	0	8	0	2	0	8	0	0	0	0	0
SO121	121	S_pap	C13	18.188	-94.375	59_4 Salino	0	0	0	0	0	0	0	0	0	0	0	0	0	0	0	5	0	0	0	0	0	0	0	6	0	0	95	0	0	0	0	0	0	0	0	1	0	5	0	0	0	0	0
SO122	122	S_gun	C13	18.188	-94.375	59_4 Salino	0	0	0	0	0	0	1	0	0	0	0	0	0	0	0	0	0	0	0	0	0	0	0	53	0	0	67	0	0	0	0	0	0	0	0	1	0	13	0	0	0	0	0
SO123	123	S_pap	C13	18.1583	-94.4117	R Coatzacoalcos	0	0	0	0	0	0	0	0	0	0	0	3	0	0	0	49	0	0	0	0	0	0	0	28	0	0	264	0	0	0	0	0	0	0	0	0	0	0	0	0	0	0	0
SO124	124	S_pap	C13	18.1583	-94.4117	R Coatzacoalcos	0	0	0	0	0	0	4	0	0	0	0	0	0	0	0	33	0	0	0	0	0	0	0	10	0	0	169	0	0	0	0	0	0	0	0	0	0	0	0	0	0	0	0
SO125	125	S_gun	C13	18.1583	-94.4117	R Coatzacoalcos	0	0	0	0	0	0	0	0	0	0	0	1	0	0	0	64	1	0	0	0	0	0	0	11	0	0	1	0	0	0	0	0	0	0	0	0	0	0	0	0	0	0	0
SO126	126	S_gun	C13	18.25	-94.5	57_05	0	0	0	0	0	0	0	0	0	0	0	0	0	0	0	239	0	0	0	0	0	0	0	0	0	0	0	0	0	0	0	0	0	0	0	0	0	2	0	0	0	0	0
SO127	127	S_gun	C13	18.25	-94.5	57_05	0	0	0	0	0	0	0	0	0	0	0	0	0	0	0	31	0	4	0	0	0	0	0	15	0	0	54	0	1	0	0	0	0	0	0	0	0	133	0	0	0	0	0
SO128	128	S_gun	C13	18.25	-94.5	57_05	0	0	0	0	0	0	0	0	0	0	0	0	0	0	0	10	0	0	0	0	0	0	0	13	0	0	282	0	0	0	0	0	0	0	0	0	0	12	0	0	0	0	0
SO129	129	S_pap	C13	18.25	-94.5	57_05	0	0	0	0	0	0	3	0	0	0	0	0	0	0	0	8	88	4	0	0	0	0	0	52	0	0	4	0	1	0	0	0	0	0	0	0	0	2	0	0	0	0	0
SO130	130	S_gun	C13	18.25	-94.5	57_05	0	0	0	0	0	0	0	0	0	0	0	0	0	0	0	107	3	0	0	0	0	0	0	30	0	0	0	0	2	0	0	0	0	0	0	0	0	0	0	0	0	0	0
SO131	131	S_pap	C13	18.5	-94.5	57_09	0	0	0	0	0	0	0	0	0	0	0	0	0	0	0	0	0	0	0	0	0	7	0	3	0	0	945	0	0	0	0	0	0	0	0	0	0	4	0	0	0	0	0
SO132	132	S_pap	C13	18.5	-94.5	57_09	0	0	0	0	0	0	1	0	0	0	0	2	0	0	0	27	0	1	2	0	0	0	0	42	0	0	87	0	0	0	0	0	0	0	2	0	0	0	0	0	0	0	0
SO133	133	S_pap	C13	20.777	-92.4391	73_09	0	0	0	0	0	0	0	0	0	0	0	0	0	0	0	6	0	0	0	0	0	0	0	36	0	0	124	0	0	0	0	0	0	0	1	0	0	46	0	0	0	0	0
SO134	134	S_pap	C13	18.75	-93.5	73_13	0	0	0	0	0	0	0	0	0	0	0	3	0	0	2	0	0	0	0	0	0	0	0	0	0	0	0	0	0	0	0	0	0	0	0	0	0	0	0	0	0	0	0
SO135	135	S_pap	C13	18.625	-93.25	77_11	0	0	0	0	0	0	3	0	0	0	0	0	0	0	0	1	0	0	0	0	0	0	0	16	0	0	183	0	0	1	0	0	0	0	0	0	0	12	0	0	0	0	0
SO136	136	S_gun	C13	18.75	-93	81_13	0	0	0	0	0	0	1	0	0	0	0	0	0	0	0	0	0	0	0	0	0	0	0	0	0	0	20	0	0	0	0	0	0	83	0	79	0	21	0	0	0	0	0
SO137	137	S_gun	C13	18.75	-95.5	81_17	0	0	0	0	0	0	0	0	0	0	0	6	0	0	0	0	0	0	0	0	0	0	0	0	0	0	105	0	0	0	0	0	0	50	0	64	0	0	0	0	0	0	0
SO138	138	S_gun	C13	19.375	-92.6875	86_23	0	0	0	0	0	0	0	3	0	0	0	0	0	0	0	0	0	0	0	0	0	0	0	51	0	0	58	0	2	0	0	0	0	0	0	0	0	0	0	0	0	0	0
SO139	139	S_gun	C13	19.3119	-91.9467	98_22	0	0	0	0	2	0	0	0	0	0	0	0	0	0	0	1425	0	0	0	0	0	0	0	120	0	0	0	0	0	0	0	0	0	0	0	0	0	0	0	0	0	0	0
SO140	140	S_pap	C13	19.4928	-92.0194	97_25	0	0	0	0	0	0	0	0	0	0	0	0	0	0	0	0	0	0	0	0	0	0	0	20	0	0	0	0	0	0	0	0	0	0	0	0	0	0	0	0	0	0	0
Fishes from Perdido region (TV)
PE1	141	S_gun	C7	24.0012	-96.4701	F1	0	0	0	0	0	0	0	0	0	0	0	1	0	0	0	1	0	0	0	0	0	0	0	3	0	0	0	0	0	0	0	0	0	0	0	0	0	0	0	0	0	0	0
PE2	142	S_gun	C7	24.0012	-96.4701	F1	0	0	0	0	0	0	0	0	0	0	0	0	0	0	0	6	0	0	0	0	0	0	0	12	0	0	0	2	0	0	0	0	0	0	0	0	0	0	0	0	0	0	0
PE3	143	S_gun	C7	24.0012	-96.4701	F1	0	0	0	0	0	0	0	0	0	0	0	0	0	0	0	1	0	0	1	0	0	0	0	3	0	0	0	0	0	0	0	0	0	0	0	0	0	0	0	0	0	0	0
PE4	144	S_gun	C8	24.0012	-96.4701	F1	0	0	0	0	1	0	0	0	0	0	0	0	0	0	0	0	0	0	0	0	0	0	0	0	0	0	5	0	0	0	0	0	0	0	0	0	0	57	0	0	0	0	0
PE5	145	S_gun	C8	24.0012	-96.4701	F1	0	0	0	0	0	0	0	0	0	0	0	0	0	0	0	17	0	0	0	0	0	0	0	12	0	0	0	0	0	0	0	0	0	0	0	0	0	0	0	0	0	0	0
PE6	146	S_gun	C8	24.0012	-96.4701	F1	0	0	0	0	1	0	0	0	0	0	0	0	0	0	0	19	0	0	0	0	1	0	0	10	0	0	0	0	0	0	6	0	0	0	0	0	0	0	0	0	0	0	0
PE7	147	S_gun	C8	24.0012	-96.4701	F1	0	0	0	0	0	0	0	0	0	0	0	0	0	0	0	0	0	0	0	0	0	0	0	3	0	0	15	0	0	0	0	0	0	0	0	0	0	0	0	0	0	0	0
PE8	148	S_gun	C8	24.0012	-96.4701	F1	0	0	0	0	0	0	0	0	0	0	0	0	0	0	0	0	0	0	0	0	0	0	0	0	0	0	0	0	0	0	0	0	0	0	0	0	0	0	0	0	0	0	0
PE9	149	S_gun	C8	24.0012	-96.4701	F1	0	0	0	0	0	0	0	0	0	0	0	0	0	0	0	2	0	0	0	0	0	0	0	22	0	0	2	0	0	2	0	0	0	0	0	0	1	0	0	0	0	0	0
PE10	150	S_gun	C9	24.0012	-96.4701	F1	0	0	0	0	0	0	0	0	0	0	0	1	0	0	0	1	0	0	0	0	0	0	0	19	0	0	4	0	0	0	0	0	0	0	0	0	0	0	0	0	0	0	0
PE11	151	S_gun	C9	24.0012	-96.4701	F1	0	0	0	0	0	0	0	0	0	0	0	0	0	0	0	0	0	0	0	0	0	0	0	0	0	0	10	0	0	0	0	0	0	0	0	0	0	0	0	0	0	0	0
PE12	152	S_gun	C7	24.0003	-96.6937	F2	0	0	0	0	1	0	0	0	0	0	0	0	0	0	0	0	0	0	0	0	0	0	0	1	0	0	38	0	0	0	0	0	5	2	0	2	0	0	0	0	0	0	1
PE13	153	S_gun	C7	24.0003	-96.6937	F2	0	0	0	0	0	0	0	0	0	0	0	0	0	0	0	0	0	0	0	0	0	0	0	10	0	0	0	0	0	0	0	0	0	0	0	0	0	0	0	0	0	0	1
PE14	154	S_gun	C7	24.0003	-96.6937	F2	0	0	0	0	0	0	0	0	0	0	0	0	0	0	0	0	0	0	4	0	0	0	0	0	0	0	0	0	0	0	0	0	0	0	0	14	0	0	0	0	0	0	0
PE15	155	S_gun	C7	24.0003	-96.6937	F2	0	0	0	0	0	0	0	0	0	0	0	0	0	0	0	0	0	0	0	0	0	0	0	5	0	0	0	0	0	0	0	0	0	0	0	0	0	0	0	0	0	0	4
PE16	156	S_gun	C7	24.0003	-96.6937	F2	0	0	0	0	0	0	0	0	0	0	0	0	0	0	0	0	0	0	0	0	0	0	0	6	0	0	0	0	0	0	0	0	0	0	0	9	0	0	0	0	0	0	0
PE17	157	S_gun	C7	24.8718	-95.1104	D2	0	0	0	0	0	0	0	0	0	0	0	0	0	0	0	0	0	0	0	0	0	0	0	0	0	0	0	0	0	0	0	0	3	0	2	0	0	0	0	0	0	0	2
PE18	158	S_gun	C7	24.8718	-95.1104	D2	0	0	0	0	0	0	0	0	0	0	0	0	0	0	0	0	0	0	0	0	0	0	1	0	0	0	0	0	0	0	0	0	0	0	0	25	0	0	0	0	0	0	1
PE19	159	S_gun	C7	24.8718	-95.1104	D2	0	0	0	0	0	0	0	0	0	0	0	0	0	0	0	0	0	0	0	0	0	0	0	0	0	0	0	0	0	0	0	0	0	0	3	0	0	0	0	0	0	0	2
PE20	160	S_gun	C7	24.8718	-95.1104	D2	0	0	0	0	0	0	0	0	0	0	0	0	0	0	0	2	0	0	3	0	0	0	0	40	0	0	0	0	0	0	0	0	0	0	0	6	0	0	0	0	0	0	0
PE21	161	S_gun	C7	24.8704	-96.7112	D1	0	0	0	0	0	0	0	0	0	0	0	0	0	0	0	2	0	0	0	0	0	0	0	16	0	0	0	2	0	0	0	0	0	0	0	0	0	0	0	0	0	0	0
PE22	162	S_gun	C7	24.8704	-96.7112	D1	0	0	0	0	2	0	0	0	0	0	0	0	0	0	0	23	0	0	0	0	0	0	0	10	0	0	0	0	1	0	0	0	0	0	0	0	0	0	0	0	0	0	0
PE23	163	S_gun	C7	24.8704	-96.7112	D1	0	0	0	0	0	0	0	0	0	0	0	0	0	0	0	0	0	0	0	0	0	0	0	16	0	0	0	3	0	1	0	0	0	0	0	0	0	0	0	0	0	0	0
PE24	164	S_gun	C7	24.8704	-96.7112	D1	0	0	0	0	0	0	0	0	0	0	0	0	0	0	0	0	0	0	3	0	0	0	0	2	0	0	13	0	0	0	0	0	0	0	0	0	0	0	0	0	0	0	0
PE25	165	S_gun	C7	24.8704	-96.7112	D1	0	0	0	0	0	0	0	0	0	0	0	0	0	0	0	0	0	0	0	0	0	0	0	18	0	0	0	1	0	0	0	0	0	0	0	0	0	0	0	0	0	0	0
PE26	166	S_gun	C7	24.8704	-96.7112	D1	0	0	0	0	0	0	0	0	0	0	0	0	0	0	0	0	0	0	0	0	0	0	0	8	0	0	0	1	0	1	1	0	0	0	0	0	0	0	0	0	0	0	0
PE27	167	S_gun	C8	24.8704	-96.7112	D1	0	0	0	0	2	0	0	0	0	0	0	0	0	0	0	9	0	0	0	0	0	0	0	5	0	0	0	0	0	5	0	0	0	0	0	0	0	0	0	0	0	0	0
PE28	168	S_gun	C8	24.8704	-96.7112	D1	0	0	0	0	0	0	0	0	0	0	0	0	0	0	0	21	0	0	0	0	0	0	0	18	0	0	1	0	0	0	1	0	0	0	0	0	0	0	0	0	0	0	0
PE29	169	S_gun	C8	24.8704	-96.7112	D1	0	0	0	0	6	0	0	0	0	0	0	0	0	0	0	65	0	0	0	0	0	0	0	26	0	0	11	1	0	0	1	0	0	0	0	1	0	3	0	0	0	0	0
PE30	170	S_gun	C8	24.8704	-96.7112	D1	0	0	0	0	0	0	1	0	0	0	0	0	0	0	0	0	6	0	0	0	0	0	0	15	0	0	0	0	3	2	0	0	0	0	0	0	0	0	0	0	0	0	0
PE31	171	S_gun	C8	24.8704	-96.7112	D1	0	0	0	0	0	0	0	0	0	0	0	0	0	0	0	1	0	0	0	0	0	0	0	3	0	0	0	0	0	0	0	0	0	0	0	4	0	0	0	0	0	0	0
PE32	172	S_gun	C8	24.8704	-96.7112	D1	0	0	0	0	0	0	0	0	0	0	0	0	0	0	0	0	0	0	0	0	0	0	0	0	0	0	0	0	0	0	0	0	0	0	0	0	0	0	0	0	0	0	0
PE33	173	S_gun	C8	24.8704	-96.7112	D1	0	0	0	0	0	0	0	0	0	0	0	0	0	0	0	0	0	0	0	0	0	0	0	0	0	0	0	0	0	0	0	0	0	0	0	0	0	0	0	0	0	0	0
PE34	174	S_gun	C8	24.8704	-96.7112	D1	0	0	0	0	0	0	0	0	0	0	0	0	0	0	0	0	0	0	0	0	0	0	0	2	0	0	0	0	0	2	0	0	0	0	0	0	0	0	0	0	0	0	0
PE35	175	S_gun	C8	24.8704	-96.7112	D1	0	0	0	0	0	0	0	0	0	0	0	0	0	0	0	0	0	0	0	0	0	0	0	0	0	0	0	0	0	0	0	0	0	0	0	0	0	0	0	0	0	0	0
PE36	176	S_pap	C7	25.2514	-96.9516	C1	0	0	0	0	0	0	0	0	0	0	0	0	0	0	0	0	0	0	0	0	0	0	0	7	0	0	1	0	0	0	0	0	0	0	0	0	0	0	0	0	0	0	0
PE37	177	S_gun	C7	25.2514	-96.9516	C1	0	0	0	0	0	0	0	0	0	0	0	0	0	0	0	0	0	0	0	0	0	0	0	0	1	0	0	0	0	0	0	0	0	0	0	0	0	0	0	0	0	0	0
PE38	178	S_gun	C7	25.2514	-96.9516	C1	0	0	0	0	0	0	0	0	0	0	0	0	0	0	0	3	0	0	0	0	0	0	0	0	0	0	0	0	0	0	0	0	0	0	0	0	0	0	0	0	0	0	0
PE39	179	S_gun	C7	25.2514	-96.9516	C1	0	0	0	0	0	0	0	0	0	0	0	0	0	0	0	0	0	0	0	0	0	0	0	21	0	0	0	1	0	0	1	0	0	0	0	0	0	0	0	0	0	0	0
PE40	180	S_gun	C7	25.2514	-96.9516	C1	0	0	0	0	0	0	0	0	0	0	0	0	0	0	0	1	0	0	0	0	0	0	0	0	0	0	0	1	0	2	0	0	0	0	0	0	0	0	0	0	0	0	0
PE41	181	S_gun	C7	25.2514	-96.9516	C1	0	0	0	0	0	0	0	0	0	0	0	0	0	0	0	1	0	0	0	0	0	0	0	0	0	0	0	0	0	0	0	0	0	0	0	0	0	0	0	0	0	0	0
PE42	182	S_gun	C8	25.2514	-96.9516	C1	0	0	0	0	0	0	0	0	0	0	0	0	0	0	0	0	0	0	0	0	0	0	0	12	0	0	0	0	1	0	0	0	0	0	0	38	0	0	0	0	0	0	0
PE43	183	S_gun	C8	25.2514	-96.9516	C1	0	0	0	0	0	0	0	0	0	0	0	0	0	0	0	0	0	0	0	0	0	0	0	0	0	0	0	1	0	0	0	0	0	0	0	0	0	0	0	0	0	0	0
PE44	184	S_gun	C8	25.2514	-96.9516	C1	0	0	0	0	0	0	0	0	0	0	0	0	0	0	0	2	0	0	0	0	0	0	0	0	0	0	0	0	0	0	0	0	0	0	0	2	0	0	0	0	0	0	0
PE45	185	S_gun	C8	25.2514	-96.9516	C1	0	0	0	0	0	0	0	0	0	0	0	1	0	0	0	0	0	0	0	0	0	0	0	16	0	0	0	0	0	0	0	0	0	0	0	3	0	0	0	0	0	0	0
PE46	186	S_pap	C7	25.6239	-95.4882	B2	0	0	0	0	0	0	0	0	0	0	0	0	0	0	0	2	0	0	0	0	0	0	0	1	0	0	1	0	0	0	0	0	7	0	0	0	0	0	0	0	0	0	2
PE47	187	S_gun	C7	25.6239	-95.4882	B2	0	0	0	0	0	0	0	0	0	0	0	0	0	0	0	0	0	0	0	0	0	0	0	12	0	0	0	1	0	0	0	0	0	0	0	0	0	0	0	0	0	0	3
PE48	188	S_gun	C7	25.6239	-95.4882	B2	0	0	0	0	0	0	0	0	0	0	0	0	0	0	0	0	0	0	0	0	0	0	0	4	0	0	4	0	0	0	0	0	2	0	0	14	0	16	0	0	0	0	0
PE49	189	S_gun	C7	25.6239	-95.4882	B2	0	0	0	0	0	0	0	0	0	0	0	0	0	0	0	1	0	0	0	0	0	0	0	4	0	0	5	0	0	0	0	0	0	0	1	5	0	2	0	0	0	0	1
PE50	190	S_pap	C7	25.6239	-95.4882	B2	0	0	0	0	0	0	0	0	0	0	0	0	0	0	0	0	0	0	0	0	0	0	0	6	0	0	17	0	0	0	0	0	0	0	2	42	0	0	0	0	0	0	0
PE51	191	S_pap	C7	20.6482	-96.85	B1	0	0	0	0	0	0	0	0	0	0	0	0	0	0	0	2	0	0	0	0	0	0	0	26	2	0	58	3	1	0	0	0	0	0	0	0	0	3	0	0	0	0	0
PE52	192	S_pap	C7	20.6482	-96.85	B1	0	0	0	0	0	0	0	0	0	0	0	0	0	0	0	0	0	0	0	0	0	0	0	1	0	0	0	0	0	1	0	0	0	0	0	0	0	0	0	0	0	0	0
PE53	193	S_gun	C8	20.6482	-96.85	B1	0	0	0	0	0	2	0	0	0	0	0	0	0	0	0	0	0	0	0	0	0	0	0	16	0	0	0	0	0	0	0	0	0	0	0	1	0	0	0	0	0	0	0
PE54	194	S_gun	C8	20.6482	-96.85	B1	0	0	0	0	0	0	0	0	0	0	0	0	0	0	0	0	0	0	0	0	0	0	0	10	0	0	0	0	0	0	0	0	0	0	0	0	0	0	0	0	0	0	0
PE55	195	S_gun	C8	20.6482	-96.85	B1	0	0	0	0	3	0	0	0	0	0	0	0	0	0	0	0	0	0	0	0	0	0	0	0	0	0	0	0	0	0	0	0	0	0	0	4	0	0	0	0	0	0	0
PE56	196	S_gun	C8	20.6482	-96.85	B1	0	0	0	0	0	1	0	0	0	0	0	0	0	0	0	56	0	0	0	0	0	0	0	15	0	0	0	0	0	0	0	0	0	0	0	31	0	0	0	0	0	0	0
PE57	197	S_pap	C10	20.7986	-96.8579	B2-E06	0	0	0	0	0	0	1	0	0	0	0	0	0	0	0	1	4	0	0	0	0	0	0	0	55	0	0	0	0	0	0	0	0	0	0	20	0	0	0	0	0	0	0
PE58	198	S_pap	C10	20.7986	-96.8579	B2-E06	0	0	0	0	0	0	2	0	0	0	0	0	0	0	0	3	18	0	4	0	0	0	0	0	0	0	0	0	0	0	0	0	0	0	0	24	0	0	0	0	0	0	0
PE59	199	S_pap	C10	20.7986	-96.8579	B2-E06	0	0	0	0	0	13	0	0	0	0	0	0	0	0	0	0	0	0	0	10	1	0	0	0	13	0	0	0	0	0	0	0	0	0	0	0	0	0	0	0	0	0	0
PE60	200	S_pap	C10	20.7986	-96.8579	B2-E06	0	0	0	0	0	0	0	0	0	0	0	1	0	0	0	0	0	0	11	0	0	0	0	0	1	0	0	0	0	0	0	0	0	0	5	0	0	0	0	0	0	0	0
PE61	201	S_pap	C10	20.7986	-96.8579	B2-E06	0	0	0	0	0	0	0	0	0	0	0	0	0	0	0	0	0	0	0	0	0	0	0	0	54	0	0	0	0	0	0	0	0	0	0	0	0	0	0	0	0	0	0
PE62	202	S_pap	C10	20.722	-96.854	B2-E07	0	0	0	0	0	0	0	0	0	0	0	2	0	0	0	5	6	0	0	0	0	0	0	0	9	0	0	0	0	0	0	0	0	0	0	19	0	0	0	0	0	0	0
PE63	203	S_pap	C10	20.722	-96.854	B2-E07	0	0	0	0	0	0	0	0	0	0	0	9	0	0	0	0	0	0	2	0	0	0	0	0	6	0	0	0	0	0	0	0	0	0	0	9	0	0	0	0	0	0	0
PE64	204	S_pap	C10	20.722	-96.854	B2-E07	0	0	0	0	0	0	0	0	0	0	0	13	0	0	0	2	0	0	9	0	0	0	0	0	5	0	0	0	0	0	0	0	0	0	0	21	0	0	0	0	0	0	0
PE65	205	S_pap	C10	20.722	-96.854	B2-E07	0	0	0	0	0	0	0	0	0	0	0	0	0	0	0	0	11	0	3	0	0	0	0	0	2	0	0	0	0	0	1	0	0	0	0	6	1	0	0	0	0	0	0
PE66	206	S_pap	C10	20.722	-96.854	B2-E07	0	0	0	0	0	0	0	0	0	0	0	8	0	0	0	0	5	0	44	0	0	0	0	0	8	0	0	0	0	1	0	0	0	0	0	0	0	0	0	0	0	0	0
PE67	207	S_pap	C10	20.6482	-96.85	B2-E08	0	0	0	0	0	0	0	0	0	0	0	0	0	0	0	0	0	0	1	0	0	0	0	0	5	0	0	0	0	0	0	0	0	0	0	0	0	0	0	0	0	0	0
PE68	208	S_gun	C10	20.6494	-96.9117	B2-E09	0	0	0	0	0	0	0	0	0	0	0	0	0	0	0	0	8	0	0	0	0	0	0	0	5	0	0	0	0	0	0	0	0	0	0	0	0	0	0	0	0	0	0
PE69	209	S_pap	C10	20.6494	-96.9117	B2-E09	0	0	0	0	0	0	0	0	0	0	0	0	0	0	0	0	0	0	0	0	0	0	0	0	12	0	0	0	0	0	0	0	0	0	0	6	0	0	0	0	0	0	0
PE70	210	S_gun	C10	20.6494	-96.9117	B2-E09	0	0	0	0	0	0	0	0	0	0	0	39	0	0	0	0	2	0	1	0	0	0	0	0	9	0	0	0	0	0	0	0	0	0	0	9	0	0	0	0	0	0	0
PE71	211	S_gun	C10	20.6494	-96.9117	B2-E09	0	0	0	0	0	0	0	0	0	0	0	0	0	0	0	0	0	0	0	0	0	0	0	0	1	0	0	0	0	0	0	0	0	0	0	0	0	0	0	0	0	0	0
PE72	212	S_gun	C10	20.6494	-96.9117	B2-E09	0	0	0	0	0	0	0	0	0	0	0	0	0	0	0	5	7	0	0	0	0	0	0	0	10	0	0	0	0	0	0	0	0	0	0	0	0	0	0	0	0	0	0
PE73	213	S_gun	C10	20.6727	-96.9416	B2-E10	0	0	0	0	0	0	0	0	0	0	0	2	0	0	0	0	5	0	0	0	0	0	0	0	16	0	0	0	0	0	0	0	0	0	0	31	0	0	0	0	0	0	0
PE74	214	S_gun	C10	20.6727	-96.9416	B2-E10	0	0	0	0	0	0	0	0	0	0	0	0	0	0	0	0	6	0	1	0	0	0	0	0	3	0	0	0	0	0	0	0	0	0	0	72	0	0	0	0	0	0	0
PE75	215	S_gun	C10	20.6727	-96.9416	B2-E10	0	0	0	0	0	2	0	0	0	0	0	0	0	0	0	0	0	0	0	0	0	0	0	0	8	0	0	0	0	0	0	0	0	0	0	0	0	0	0	0	0	0	0
PE76	216	S_gun	C10	20.6727	-96.9416	B2-E10	0	0	0	0	0	0	1	0	0	0	0	1	0	0	0	0	15	0	0	0	0	0	0	0	2	0	0	0	0	0	1	0	0	0	0	28	0	0	0	0	0	0	0
PE77	217	S_gun	C10	20.6727	-96.9416	B2-E10	0	0	0	0	0	0	0	0	0	0	0	0	0	0	0	2	5	0	0	0	0	0	0	0	0	0	0	0	0	1	0	0	0	0	0	0	0	0	0	0	0	0	0
PE78	218	S_pap	C10	20.694	-96.9467	B2-E14	0	0	0	0	0	0	1	0	0	0	0	1	0	0	0	27	34	0	0	0	0	0	0	0	8	0	0	0	0	0	0	0	0	0	0	4	23	0	0	0	0	0	0
PE79	219	S_pap	C10	20.694	-96.9467	B2-E14	0	0	0	0	0	0	0	0	0	0	0	0	0	0	0	0	0	0	0	0	0	0	0	0	0	0	0	0	0	0	0	0	0	0	0	0	0	0	0	0	0	0	0
PE80	220	S_pap	C10	20.694	-96.9467	B2-E14	0	0	0	0	0	0	1	0	0	0	0	0	0	0	0	1	22	0	0	0	0	0	0	0	81	0	0	0	0	0	0	0	0	0	0	3	73	0	0	0	0	0	0
PE81	221	S_pap	C10	20.694	-96.9467	B2-E14	0	0	0	0	0	3	0	0	0	0	0	0	0	0	0	2	0	0	1	0	0	0	0	0	4	0	0	0	0	0	0	0	0	0	0	13	2	0	0	1	0	0	0
Fishes from the Yucatan shelf (YS)
YU1	222	S_pap	C3	22.5495	-90.4021	F29	0	0	0	0	0	0	4	0	0	0	0	76	0	0	0	0	0	1	0	0	0	0	0	0	0	0	324	0	0	1	1	0	0	0	0	0	0	0	0	0	0	0	0
YU2	223	S_gun	C3	22.5495	-90.4021	F29	0	0	0	0	0	0	0	0	0	0	0	39	0	0	0	0	0	0	2	0	0	0	0	4	0	0	367	0	0	4	0	0	0	0	0	0	0	0	0	0	0	0	0
YU3	224	S_pap	C3	22.5495	-90.4021	F29	0	0	0	0	0	0	0	0	0	0	1	51	0	0	0	2	2	0	0	3	2	0	0	0	0	0	308	0	0	2	0	0	0	0	0	0	0	0	0	0	0	0	0
YU4	225	S_pap	C3	22.5495	-90.4021	F29	0	0	0	0	0	0	0	0	0	0	0	55	0	0	0	0	0	8	6	0	0	0	0	0	0	0	0	0	0	0	1	0	0	0	0	0	0	0	0	0	0	0	0
YU5	226	S_pap	C3	22.5495	-90.4021	F29	0	0	0	0	0	0	0	0	0	0	0	13	0	0	0	0	4	2	1	0	0	0	0	0	0	0	0	0	0	0	0	0	0	0	0	0	0	0	0	0	0	0	0
YU6	227	S_pap	C3	22.5495	-90.4021	F29	0	0	0	0	0	0	1	0	0	0	0	172	0	0	0	0	4	0	0	0	1	0	0	6	0	0	314	0	1	0	1	0	0	0	0	0	0	0	0	0	0	0	0
YU7	228	S_pap	C5	22.5495	-90.4021	F29	0	0	0	0	11	0	0	0	0	0	0	59	0	0	0	193	29	0	1	0	0	0	0	0	0	0	352	0	1	0	0	0	0	0	0	0	0	0	0	0	0	0	0
YU8	229	S_gun	C5	22.5495	-90.4021	F29	0	0	0	0	1	0	0	0	0	0	0	14	0	0	0	3	7	0	3	0	0	0	0	3	0	0	201	10	0	8	0	0	0	0	0	0	0	0	0	0	0	0	0
YU9	230	S_pap	C5	22.5495	-90.4021	F29	1	0	0	0	1	0	0	0	0	0	0	33	0	0	0	0	1	0	4	0	0	0	0	8	0	0	71	0	1	0	6	0	0	0	0	1	0	0	0	0	0	0	0
YU10	231	S_pap	C5	22.5495	-90.4021	F29	0	0	0	0	0	0	0	0	0	0	0	36	0	0	0	0	80	0	0	38	0	0	0	0	0	0	176	0	1	0	0	0	0	0	0	0	0	0	0	0	0	0	1
YU11	232	S_pap	C5	22.5495	-90.4021	F29	0	0	0	0	0	0	0	0	0	0	0	20	0	0	0	298	3	0	0	0	0	0	0	26	0	0	183	0	0	0	0	0	0	0	0	0	0	0	0	0	0	0	3
YU12	233	S_pap	C5	22.5495	-90.4021	F29	0	0	0	0	2	5	0	0	0	0	0	29	0	0	0	8	8	0	0	4	0	0	0	18	0	0	282	0	0	0	3	0	0	0	0	0	0	0	0	0	0	0	0
YU13	234	S_pap	C6	22.5495	-90.4021	F29	0	0	0	0	0	0	0	0	0	0	0	9	0	0	0	2	0	0	2	2	0	0	0	0	0	0	11	0	0	1	3	0	0	0	0	0	0	0	0	0	0	0	0
YU14	235	S_pap	C6	22.5495	-90.4021	F29	0	0	0	0	0	0	0	0	0	0	0	18	0	0	0	0	22	1	0	0	0	0	0	49	0	0	29	0	0	1	0	0	0	0	0	0	0	0	0	0	0	0	0
YU15	236	S_pap	C6	22.5495	-90.4021	F29	0	0	0	0	0	0	0	0	0	0	0	24	0	0	0	0	29	0	0	0	0	0	1	26	2	0	244	0	0	0	0	0	0	0	0	0	0	0	0	0	0	0	0
YU16	237	S_pap	C6	22.5495	-90.4021	F29	0	0	0	0	0	0	0	0	0	0	0	7	0	0	0	0	0	68	0	0	0	0	0	7	0	0	579	1	0	0	0	0	0	0	0	0	0	0	0	0	0	0	0
YU17	238	S_pap	C6	22.5495	-90.4021	F29	0	0	0	0	0	0	0	0	0	0	0	0	0	0	0	0	35	0	0	0	0	0	0	2	0	0	331	0	0	0	0	0	0	0	0	0	0	0	0	0	0	0	0
YU18	239	S_pap	C6	22.5495	-90.4021	F29	0	0	0	0	0	0	1	0	0	0	0	29	1	0	0	0	8	0	0	1	0	0	0	15	3	0	834	0	0	1	0	0	0	1	0	0	0	0	0	0	0	0	0
YU19	240	S_pap	C6	22.5495	-90.4021	F29	0	0	0	0	0	0	1	0	0	0	0	46	0	0	0	0	2	4	1	0	0	0	0	0	0	0	40	0	0	3	0	0	0	0	0	1	0	0	0	0	0	0	0
YU20	241	S_pap	C6	22.5495	-90.4021	F29	0	0	0	0	0	0	0	0	0	0	0	9	0	0	0	0	43	0	0	0	0	0	0	16	1	0	636	0	0	3	0	0	0	0	0	0	0	0	0	0	0	0	0
YU21	242	S_pap	C6	22.5495	-90.4021	F29	0	0	0	0	0	0	0	0	0	0	0	31	0	0	0	0	0	14	0	0	0	3	0	14	1	0	0	0	0	0	0	0	0	0	0	0	0	0	0	0	0	0	0
YU22	243	S_pap	C6	22.5495	-90.4021	F29	0	0	0	0	0	8	1	0	0	0	0	32	0	0	0	0	5	0	7	0	0	0	0	7	0	0	28	0	0	0	0	0	0	0	0	0	0	0	0	0	0	0	0
YU23	244	S_pap	C3	22.7302	-89.8619	G34	0	0	0	0	0	0	1	0	0	0	0	10	0	0	0	0	24	0	0	0	0	0	0	1	0	0	385	0	0	11	0	0	0	0	0	0	0	0	0	0	0	0	0
YU24	245	S_gun	C3	22.7302	-89.8619	G34	0	0	0	0	0	0	0	0	0	0	0	39	0	0	0	0	4	0	10	17	0	0	0	6	0	0	0	0	0	1	0	0	0	0	0	0	0	0	0	0	0	0	0
YU25	246	S_gun	C3	22.7302	-89.8619	G34	0	0	0	0	0	0	0	0	0	0	0	20	0	0	0	0	0	0	0	2	0	0	0	2	0	0	25	0	0	2	0	0	0	0	0	0	0	0	0	0	0	0	0
YU26	247	S_pap	C3	22.7302	-89.8619	G34	0	0	0	0	0	0	0	0	0	0	0	29	0	0	0	0	0	0	0	0	0	0	0	0	0	0	49	0	0	0	0	0	0	0	0	0	0	0	0	0	0	0	0
YU27	248	S_pap	C5	20.7744	-97.2006	G34	2	0	0	0	1	0	0	0	0	0	0	9	0	0	0	0	129	0	0	0	0	0	0	0	0	0	95	0	0	0	0	1	0	0	0	0	0	0	0	0	0	0	0
YU28	249	S_pap	C5	20.7744	-97.2006	G34	0	1	0	0	0	0	1	0	0	0	6	12	0	0	0	0	4	0	0	0	0	0	0	7	0	0	292	0	0	0	0	0	0	0	0	0	0	0	0	0	0	0	0
YU29	250	S_pap	C5	20.7744	-97.2006	G34	1	0	0	0	0	0	0	0	0	0	0	21	0	0	0	173	0	0	0	0	0	0	0	0	0	0	215	0	0	0	0	0	0	0	0	0	0	0	0	0	0	0	0
YU30	251	S_pap	C5	20.7744	-97.2006	G34	0	0	0	0	9	0	0	0	0	0	2	6	0	0	0	22	11	0	0	0	0	0	0	14	0	0	78	0	0	0	10	0	0	0	0	0	0	0	0	0	0	0	0
YU31	252	S_pap	C5	20.7744	-97.2006	G34	1	0	0	0	47	0	0	0	0	0	3	19	0	0	0	43	9	0	0	0	0	0	0	41	0	0	90	0	0	0	9	0	0	0	0	0	0	0	0	0	0	0	0
YU32	253	S_pap	C6	20.7744	-97.2006	G34	0	0	0	0	0	0	0	0	0	0	0	47	0	0	0	0	0	0	6	0	116	0	0	8	0	0	96	0	0	0	0	0	0	0	0	0	0	0	0	0	0	0	0
YU33	254	S_pap	C6	20.7744	-97.2006	G34	0	0	0	0	64	0	0	0	0	0	0	30	0	0	0	2	9	0	0	0	0	0	0	9	0	0	1041	1	1	1	0	0	0	0	0	0	0	0	0	0	0	0	0
YU34	255	S_pap	C6	20.7744	-97.2006	G34	0	0	0	0	4	0	0	0	0	0	0	14	0	0	0	1	9	0	0	0	0	0	0	18	0	0	127	0	0	2	0	0	0	0	0	0	0	0	0	0	0	0	0
YU35	256	S_pap	C6	20.7744	-97.2006	G34	0	0	0	0	0	0	0	0	0	0	0	23	0	0	0	0	0	18	2	0	0	1	0	7	0	0	0	0	0	1	0	0	0	0	0	0	0	0	0	0	0	0	0
YU36	257	S_pap	C6	20.7744	-97.2006	G34	0	0	0	8	0	0	0	0	0	0	0	2	0	0	0	1	0	0	0	0	0	0	0	3	0	0	651	0	0	2	0	0	0	0	0	0	0	0	0	0	0	0	0
YU37	258	S_pap	C6	20.7744	-97.2006	H39	0	0	0	0	8	0	0	0	0	0	1	51	0	0	0	0	13	0	0	0	0	0	0	2	0	0	0	0	0	0	2	0	0	0	0	126	0	0	0	0	0	0	5
YU38	259	S_pap	C3	22.8246	-89.4387	H39	0	0	0	0	0	0	0	0	0	0	0	57	0	0	0	0	0	0	0	0	0	0	0	0	0	0	0	0	0	0	6	0	0	0	0	0	0	0	0	0	0	0	0
YU39	260	S_pap	C3	22.8246	-89.4387	H39	0	0	0	0	0	0	0	0	0	0	0	137	0	0	0	4	2	0	0	0	0	0	0	6	0	0	234	0	0	8	0	0	0	0	0	0	0	0	0	0	0	0	0
YU40	261	S_pap	C3	22.8246	-89.4387	H39	0	0	0	0	0	8	0	0	0	0	0	7	0	0	0	25	0	0	1	5	2	0	0	0	0	0	0	0	0	1	0	0	0	0	0	0	0	0	1	0	0	0	0
YU41	262	S_pap	C3	22.8246	-89.4387	H39	0	0	0	0	0	0	0	0	0	0	0	34	0	0	0	0	65	0	2	0	0	0	0	3	0	0	168	0	1	1	0	0	0	0	0	0	0	0	0	0	0	0	1
YU42	263	S_pap	C5	22.8246	-89.4387	H39	0	0	0	0	0	0	0	0	0	0	0	55	0	0	0	0	15	0	7	0	0	0	0	38	0	0	0	0	0	0	2	0	0	0	0	0	0	0	0	0	0	0	3
YU43	264	S_pap	C5	22.8246	-89.4387	H39	0	0	0	0	0	0	0	0	0	0	0	0	0	0	0	0	0	0	0	0	0	0	0	0	0	0	0	0	0	0	0	0	0	0	0	0	0	0	0	0	0	0	1
YU44	265	S_pap	C5	22.8246	-89.4387	H39	0	0	0	0	0	0	0	0	0	0	0	0	0	0	0	0	2	0	1	0	0	0	0	0	0	0	26	0	0	0	1	0	0	0	0	0	0	0	0	0	0	0	0
YU45	266	S_pap	C5	22.8246	-89.4387	H39	0	0	0	0	0	0	0	0	0	0	0	21	0	0	0	0	5	0	0	0	0	0	0	19	0	0	75	1	0	0	0	0	0	0	0	0	0	0	0	0	0	0	0
YU46	267	S_pap	C5	22.8246	-89.4387	H39	0	0	0	0	3	0	0	0	0	0	0	118	0	0	0	3	5	0	0	0	0	0	0	9	0	0	58	0	0	0	0	0	0	0	0	0	0	0	0	0	0	0	1
YU47	268	S_pap	C3	23.2795	-89.5	H40	0	0	0	0	0	0	0	0	0	0	0	73	0	0	0	0	0	0	5	43	0	0	0	3	0	0	218	2	0	5	0	0	0	0	0	0	0	0	0	0	0	0	0
YU48	269	S_pap	C3	23.2795	-89.5	H40	0	0	0	0	0	0	2	0	0	0	0	80	0	0	1	0	12	0	2	0	0	0	0	1	0	0	262	0	5	3	2	0	0	0	0	0	0	0	0	0	0	0	0
YU49	270	S_pap	C5	23.2795	-89.5	H40	0	0	0	0	0	0	0	0	0	0	0	8	0	0	0	0	0	0	0	0	0	0	0	0	0	0	15	1	1	0	0	0	0	0	0	3	0	0	0	0	0	0	0
YU50	271	S_pap	C5	23.2795	-89.5	H40	0	0	0	0	0	0	0	0	0	0	0	11	0	0	0	1	0	0	0	0	0	0	0	2	0	0	18	0	4	1	0	0	0	0	0	0	0	0	0	0	0	0	0
YU51	272	S_pap	C5	23.2795	-89.5	H40	0	0	0	0	1	0	0	0	0	0	0	6	0	0	0	0	0	0	0	1	0	0	0	0	0	0	12	0	1	0	0	0	0	0	0	0	0	24	0	0	0	0	0
YU52	273	S_pap	C5	23.2795	-89.5	H40	0	0	0	0	0	0	0	0	0	0	0	5	0	0	0	4	0	0	0	0	0	0	0	0	0	0	57	0	0	3	0	0	0	0	0	0	0	0	0	0	0	0	0
YU53	274	S_pap	C3	22.883	-89.0323	I43	0	0	0	0	0	0	0	0	0	0	0	21	0	0	0	0	0	1	0	0	0	0	0	0	0	0	0	0	0	0	0	0	0	0	0	0	0	0	0	0	0	0	0
YU54	275	S_pap	C3	22.883	-89.0323	I43	0	0	0	0	0	0	0	0	0	0	0	36	0	0	0	0	18	0	6	0	0	0	0	7	0	0	73	0	0	0	0	0	0	0	0	0	0	0	0	0	0	0	2
YU55	276	S_pap	C3	22.883	-89.0323	I43	0	0	0	0	0	0	0	0	0	0	0	50	0	0	0	0	0	0	0	0	0	0	0	0	0	0	0	0	0	0	0	0	0	0	0	0	0	0	0	0	0	0	4
YU56	277	S_pap	C3	22.883	-89.0323	I43	0	0	0	0	0	0	1	0	0	0	0	28	0	0	0	0	0	0	0	0	0	0	0	0	0	0	0	0	0	0	0	0	0	0	0	0	0	0	0	0	0	0	1
YU57	278	S_pap	C3	22.883	-89.0323	I43	0	0	0	0	0	0	0	0	0	0	0	23	0	0	0	0	0	0	0	0	8	0	0	3	0	0	100	0	0	0	0	0	0	0	0	9	0	0	0	0	0	0	1
YU58	279	S_pap	C3	22.883	-89.0323	I43	0	0	0	0	1	0	0	0	0	0	0	48	0	0	0	0	2	1	0	1	0	0	1	4	0	0	205	0	0	2	0	0	0	0	0	0	0	0	0	0	0	0	2
YU59	280	S_pap	C5	22.8246	-89.4387	I43	0	0	0	0	0	0	0	0	0	0	0	29	0	0	0	6	0	0	0	0	0	0	0	1	0	0	94	0	0	0	0	0	0	0	0	0	0	0	0	0	0	0	0
YU60	281	S_pap	C6	22.8246	-89.4387	I43	0	0	0	0	0	0	2	0	0	0	0	107	0	0	0	0	4	0	0	0	0	0	0	8	0	0	237	0	0	0	0	0	0	0	0	1	0	0	0	0	0	0	6
YU61	282	S_pap	C6	22.8246	-89.4387	I43	2	0	0	0	0	0	0	0	0	0	0	89	0	0	0	0	8	2	0	0	0	0	0	1	0	0	0	0	0	2	0	1	0	0	0	0	0	0	0	0	0	0	1
YU62	283	S_pap	C6	22.8246	-89.4387	I43	0	0	0	0	0	23	2	0	0	0	0	38	0	0	0	0	0	0	8	39	0	0	0	7	0	0	146	0	0	1	0	2	0	0	0	0	0	0	0	0	0	0	2
YU63	284	S_pap	C6	22.8246	-89.4387	I43	0	0	0	0	0	0	0	0	0	0	1	62	0	0	0	0	0	0	3	18	0	0	0	1	0	0	578	0	0	0	0	0	0	0	0	0	0	0	0	0	0	0	6
YU64	285	S_pap	C6	22.8246	-89.4387	I43	0	0	0	0	3	0	0	0	0	0	0	69	0	0	0	1	0	0	3	0	0	0	0	16	0	0	82	0	3	1	1	0	0	0	0	2	0	0	0	0	0	0	3
YU65	286	S_pap	C6	22.8246	-89.4387	I43	0	0	0	0	2	0	0	0	0	0	3	53	0	0	0	3	0	2	0	9	0	1	0	1	0	0	246	0	1	0	0	0	0	0	0	0	0	0	0	0	0	0	4
YU66	287	S_pap	C6	22.8246	-89.4387	I43	5	0	0	0	1	0	0	0	0	0	0	39	0	0	0	0	2	7	12	15	0	0	0	1	0	0	483	0	0	0	0	0	0	0	0	1	0	0	0	0	0	0	8
YU67	288	S_pap	C3	23.7284	-89.0533	I45	0	0	0	0	1	21	3	0	0	0	1	34	0	0	0	0	0	0	1	17	0	0	0	0	0	0	0	0	0	0	0	0	0	0	0	3	0	0	0	0	0	0	0
YU68	289	S_pap	C3	23.7284	-89.0533	I45	0	0	0	0	8	0	2	0	0	0	0	33	0	0	0	0	0	0	1	0	0	0	0	1	0	1	412	0	0	0	1	0	0	0	0	0	0	0	0	0	0	0	0
YU69	290	S_pap	C3	23.7284	-89.0533	I45	0	0	0	0	0	3	0	0	0	0	0	0	0	0	0	5	3	0	7	0	0	0	0	1	0	0	12	0	0	3	0	0	0	0	0	3	0	0	0	0	0	0	0
YU70	291	S_pap	C3	23.7284	-89.0533	I45	0	0	0	0	0	0	0	0	0	0	0	20	0	0	0	15	0	0	6	0	0	0	0	1	0	0	43	0	0	0	0	0	0	0	0	0	0	0	0	0	0	0	0
YU71	292	S_pap	C3	22.6212	-88.6319	J48	0	0	0	0	0	0	0	0	0	0	0	3	0	0	0	13	0	0	8	0	0	0	0	0	0	0	48	1	0	1	0	0	0	0	0	0	0	0	0	0	0	0	0
YU72	293	S_pap	C3	22.6212	-88.6319	J48	0	0	0	0	0	0	1	0	0	0	0	16	0	0	0	0	0	0	2	1	0	0	0	0	0	0	282	0	0	21	0	0	0	0	0	0	0	0	0	0	0	0	0
YU73	294	S_pap	C3	22.6212	-88.6319	J48	0	0	0	0	0	0	1	0	0	0	0	51	0	0	0	0	0	0	0	0	0	0	0	0	0	0	0	0	0	9	0	0	0	0	0	0	0	0	0	0	0	0	0
YU74	295	S_pap	C5	22.6212	-88.6319	J48	0	0	0	0	0	0	0	0	0	0	0	6	0	0	0	0	73	0	0	0	0	0	0	0	0	0	119	0	0	0	0	0	0	0	0	0	0	0	0	0	0	0	0
YU75	296	S_pap	C5	22.6212	-88.6319	J48	2	0	0	0	30	0	0	0	0	0	1	65	0	0	0	64	0	0	6	0	0	0	0	0	0	0	194	0	0	1	8	0	0	3	0	0	0	0	0	0	0	0	0
YU76	297	S_pap	C5	22.6212	-88.6319	J48	0	0	0	0	0	0	0	0	0	0	1	79	0	0	0	0	0	0	2	0	0	0	0	9	0	0	1	0	0	0	0	0	0	0	0	0	0	18	0	0	0	0	1
YU77	298	S_pap	C5	22.6212	-88.6319	J48	0	0	10	0	0	0	0	0	0	0	7	41	0	0	0	3	1	0	0	0	0	0	0	0	0	0	0	0	0	0	0	0	0	1	0	0	0	0	0	0	0	0	0
YU78	299	S_pap	C5	22.6212	-88.6319	J48	0	0	0	0	20	41	0	0	0	0	0	22	0	0	0	48	1	0	0	10	0	2	0	19	0	0	35	0	0	1	8	0	0	0	0	0	0	0	0	0	0	0	1
YU79	300	S_pap	C5	22.6212	-88.6319	J48	0	0	0	0	0	0	0	0	0	0	5	14	0	0	0	35	0	0	0	0	0	2	0	4	0	0	99	0	0	0	0	0	0	0	0	0	0	0	0	0	0	0	1
YU80	301	S_pap	C5	22.6212	-88.6319	J48	0	0	0	0	0	18	0	0	0	0	0	26	0	0	0	33	1	0	8	0	0	1	0	12	0	0	91	0	0	2	0	0	0	0	0	0	0	8	0	0	0	0	0
YU81	302	S_pap	C5	22.6212	-88.6319	J48	0	0	0	0	0	0	0	0	0	0	0	74	0	0	0	24	0	0	0	0	0	0	0	12	0	0	24	0	2	0	0	0	0	0	0	0	0	0	0	0	0	0	0
YU82	303	S_pap	C6	22.6212	-88.6319	J48	1	0	0	0	0	0	1	0	0	0	14	153	0	0	0	0	21	0	6	0	0	1	0	7	0	0	87	4	4	27	0	0	0	1	0	1	0	3	0	0	0	0	0
YU83	304	S_pap	C6	22.6212	-88.6319	J48	2	0	0	0	138	0	9	0	0	0	46	159	0	0	0	0	126	0	8	0	0	0	0	0	0	0	23	0	0	5	0	0	0	13	0	23	0	4	0	0	0	0	0
YU84	305	S_pap	C6	22.6212	-88.6319	J48	0	0	0	0	0	0	0	0	0	0	21	157	0	0	0	2	0	0	1	0	0	0	0	4	0	0	54	1	0	22	7	0	0	0	0	0	0	0	0	0	0	0	0
YU85	306	S_pap	C6	22.6212	-88.6319	J48	0	0	0	0	3	1	1	0	0	0	67	179	0	1	0	0	1	5	0	4	0	0	0	2	0	0	251	0	0	3	0	0	0	3	0	2	0	328	0	0	0	0	0
YU86	307	S_pap	C6	22.6212	-88.6319	J48	1	0	0	0	0	29	0	0	0	0	5	81	0	0	0	0	0	0	5	36	0	0	0	2	0	0	0	0	0	2	0	0	0	0	0	0	0	2	0	0	0	0	0
YU87	308	S_pap	C6	22.6212	-88.6319	J48	0	0	0	0	5	0	0	0	0	0	3	56	0	0	0	0	1	1	0	2	0	0	0	3	0	0	119	0	1	9	0	0	0	0	0	0	0	0	0	0	0	0	0
YU88	309	S_pap	C3	23.3052	-87.6212	L59	0	0	0	0	0	0	0	0	0	0	0	17	0	0	0	0	5	0	0	0	0	0	0	2	0	0	611	0	0	7	0	0	0	0	0	0	0	0	0	0	0	0	0
YU89	310	S_pap	C3	23.3052	-87.6212	L59	0	0	0	0	0	0	0	0	0	0	0	8	0	0	0	0	0	3	3	0	0	0	0	0	0	0	0	0	0	0	0	0	0	0	0	0	0	0	0	0	0	0	0
YU90	311	S_pap	C3	23.3052	-87.6212	L59	0	0	0	0	0	0	1	0	0	0	0	13	0	0	0	0	0	0	3	0	0	0	0	0	0	1	386	0	0	12	0	0	0	0	0	0	0	0	0	0	0	0	0
YU91	312	S_pap	C3	23.3052	-87.6212	L59	1	0	0	0	0	0	0	0	0	0	0	16	0	0	0	0	36	0	2	0	0	0	0	6	0	0	76	0	0	3	0	0	0	0	0	0	0	0	0	0	0	0	1
YU92	313	S_pap	C3	23.3052	-87.6212	L59	0	0	0	0	0	0	0	0	0	0	0	1	0	0	0	0	0	4	1	0	0	0	0	2	0	0	332	2	0	14	0	0	0	0	0	0	0	0	0	0	0	0	0
YU93	314	S_pap	C3	23.3052	-87.6212	L59	0	0	0	0	0	0	3	0	0	0	1	7	0	0	0	0	1	1	2	0	0	0	0	2	1	0	265	0	0	2	0	0	0	0	0	0	0	0	0	0	0	0	0
YU94	315	S_pap	C3	23.3052	-87.6212	L59	0	0	0	0	0	0	1	0	0	0	10	15	0	0	0	0	0	2	2	0	0	0	0	1	0	0	0	0	0	4	0	0	0	0	0	0	0	0	0	0	0	0	0
YU95	316	S_pap	C5	23.3052	-87.6212	L59	0	0	0	0	0	0	0	0	0	0	0	6	0	0	0	1	10	0	0	0	0	0	0	0	0	0	189	1	0	0	0	0	0	0	0	0	0	0	0	0	0	0	2
YU96	317	S_pap	C5	23.3052	-87.6212	L59	0	0	0	0	0	0	0	0	0	0	0	7	0	0	0	21	0	0	1	0	0	0	0	0	0	0	0	0	0	1	0	0	0	0	0	0	0	0	0	0	0	0	1
YU97	318	S_pap	C5	23.3052	-87.6212	L59	0	0	0	0	0	0	1	0	0	0	0	2	0	0	0	7	0	0	7	0	0	0	0	1	0	0	74	0	0	2	1	0	0	0	0	0	0	0	0	0	0	0	0
YU98	319	S_pap	C5	23.3052	-87.6212	L59	0	0	0	0	0	0	0	0	0	0	0	7	0	0	0	0	0	0	2	0	0	0	0	0	0	0	79	0	0	3	0	0	0	0	0	0	0	0	0	0	0	0	1
YU99	320	S_pap	C5	23.3052	-87.6212	L59	0	0	0	0	0	0	0	0	0	0	0	5	0	0	0	1	0	0	5	0	0	0	0	0	0	0	117	0	2	0	0	0	0	0	0	0	0	41	0	0	0	0	4
YU100	321	S_pap	C6	23.3052	-87.6212	L59	0	0	0	0	0	3	0	0	0	0	13	17	0	0	0	0	0	10	4	0	0	0	0	1	1	0	276	0	0	2	0	0	0	0	0	0	0	0	0	0	0	0	2
YU101	322	S_pap	C6	23.3052	-87.6212	L59	0	0	0	0	0	0	0	0	0	0	0	30	0	0	0	3	3	4	3	1	0	0	1	1	0	0	380	0	0	7	0	0	0	0	1	0	0	0	0	0	0	0	1
YU102	323	S_pap	C6	23.3052	-87.6212	L59	1	0	0	0	0	0	1	1	0	0	12	3	0	0	0	0	0	2	0	0	0	0	1	0	0	0	0	0	0	3	0	0	0	0	0	1	0	0	0	0	0	0	2
YU103	324	S_pap	C6	23.3052	-87.6212	L59	1	0	0	0	0	0	1	0	0	0	10	10	0	0	0	0	2	6	7	0	0	0	0	3	0	0	7	0	0	6	1	0	0	0	0	0	0	0	0	0	0	0	0
YU104	325	S_pap	C6	23.3052	-87.6212	L59	2	0	0	0	0	0	0	0	0	0	0	10	0	0	0	0	1	1	11	0	0	0	0	4	0	0	360	0	0	8	0	0	0	0	0	0	0	0	0	0	0	0	3
YU105	326	S_pap	C6	23.3052	-87.6212	L59	0	0	0	0	0	0	0	0	0	0	4	1	0	0	0	0	0	6	1	0	0	0	0	1	0	0	200	0	2	10	0	0	0	0	0	0	0	0	0	0	0	0	3
YU106	327	S_pap	C6	23.3052	-87.6212	L59	0	0	0	0	0	0	0	0	0	0	1	1	0	0	0	0	2	7	3	0	0	0	0	4	2	0	562	0	0	1	0	2	0	0	0	0	0	0	0	0	0	0	2
YU107	328	S_pap	C6	23.3052	-87.6212	L59	0	0	0	0	0	6	0	0	0	0	17	23	0	0	0	34	1	4	5	12	0	0	0	0	0	0	322	0	0	1	0	1	0	0	0	0	0	0	0	0	0	0	2
YU108	329	S_pap	C6	23.3052	-87.6212	L59	0	0	0	0	1	0	2	0	0	0	0	6	0	0	0	0	7	2	3	0	1	35	5	5	0	0	191	0	0	10	0	0	0	1	0	0	0	0	0	0	0	0	1
YU109	330	S_pap	C6	23.3052	-87.6212	L59	0	0	0	0	36	0	0	0	0	0	0	8	0	0	0	0	139	0	7	0	0	0	0	0	0	0	124	0	1	0	0	0	0	0	0	0	0	43	0	0	0	0	1
YU110	331	S_pap	C6	22.7255	-87.33	M63	0	0	0	0	7	3	0	0	0	0	52	32	0	0	0	0	0	0	7	15	0	4	0	0	0	0	40	0	0	2	1	4	0	0	0	0	0	0	0	0	0	0	0
YU111	332	S_pap	C6	22.7255	-87.33	M63	0	0	0	0	0	0	1	0	0	2	5	33	0	0	1	0	1	0	0	0	0	0	0	3	0	0	5	0	0	0	0	0	0	0	0	0	0	0	0	0	0	0	0
YU112	333	S_pap	C6	22.7255	-87.33	M63	0	0	0	0	0	0	0	0	0	0	13	8	0	0	0	0	0	0	0	0	0	0	0	0	0	0	0	0	0	1	1	0	0	0	0	0	0	0	0	0	0	0	1
YU113	334	S_pap	C6	22.7255	-87.33	M63	0	0	0	0	1	0	0	0	0	0	1	2	0	0	0	5	0	0	0	29	0	0	0	0	0	0	24	0	0	0	0	0	0	0	1	0	0	0	0	0	0	0	0
YU114	335	S_pap	C6	22.7255	-87.33	M63	0	0	0	0	0	0	1	0	0	0	0	20	0	0	0	0	1	3	3	0	0	0	0	1	0	0	13	0	0	18	2	0	0	0	0	0	0	0	0	0	0	0	0
YU115	336	S_pap	C6	22.7255	-87.33	M63	0	0	0	0	2	0	0	0	0	0	0	1	0	0	0	0	3	0	0	0	0	0	0	0	0	0	0	0	0	5	0	2	0	0	0	0	0	0	0	0	0	0	0
YU116	337	S_pap	C6	22.7255	-87.33	M63	0	0	0	0	0	0	0	0	0	0	26	6	0	0	0	2	0	0	0	1	0	0	0	3	0	0	15	0	0	0	0	0	0	0	0	0	0	0	0	0	0	0	0
YU117	338	S_pap	C6	22.7255	-87.33	M63	0	0	0	0	2	17	0	0	0	0	31	15	0	0	0	10	0	0	7	45	0	0	0	0	0	0	26	0	0	0	2	0	0	0	0	0	0	0	0	0	0	0	0
YU118	339	S_pap	C6	22.7255	-87.33	M63	0	0	0	0	0	0	0	0	0	0	0	8	0	0	0	0	0	0	10	4	0	1	0	2	0	0	13	0	0	0	0	0	0	0	0	0	1	0	0	0	0	0	0
YU119	340	S_pap	C3	22.0707	-86.9187	O73	1	0	0	0	0	0	0	0	0	0	2	9	0	0	0	0	0	0	1	0	0	0	0	0	0	0	8	0	2	1	0	0	0	0	0	0	0	0	0	0	0	0	0
YU120	341	S_pap	C3	22.0707	-86.9187	O73	1	0	0	0	0	0	0	0	0	0	0	0	0	0	0	0	0	0	0	0	0	0	0	0	0	0	0	0	0	0	0	0	0	0	0	0	0	0	0	0	0	0	0
YU121	342	S_pap	C3	22.0707	-86.9187	O73	0	0	0	0	0	0	0	0	0	0	0	0	0	0	0	0	0	0	2	0	0	0	0	0	0	0	0	0	0	0	0	0	0	0	0	0	0	0	0	0	0	0	0
YU122	343	S_pap	C6	22.0707	-86.9187	O73	0	0	0	0	0	0	0	0	0	0	0	4	0	0	0	0	2	0	2	0	0	0	0	0	0	0	0	0	0	1	0	0	0	0	0	0	0	0	0	0	0	0	0
YU123	344	S_pap	C6	22.0707	-86.9187	O73	0	0	0	0	0	2	0	0	0	0	0	4	0	0	0	0	0	1	0	0	0	0	0	0	0	0	7	0	0	0	0	0	0	0	0	0	1	0	0	0	0	0	0
YU124	345	S_pap	C6	22.0707	-86.9187	O73	0	0	0	0	40	0	0	0	0	0	9	0	0	0	0	0	0	2	6	0	0	0	0	18	0	0	0	0	0	23	0	0	0	0	0	3	0	0	0	0	0	0	0
YU125	346	S_pap	C6	22.0707	-86.9187	O73	0	0	0	0	0	0	0	0	0	0	1	11	0	1	0	0	0	0	1	0	0	0	0	0	0	0	22	0	0	0	1	0	0	0	0	0	0	1	0	0	0	0	0
YU126	347	S_pap	C6	22.0707	-86.9187	O73	0	0	0	0	0	1	0	0	2	0	1	6	0	0	0	1	0	6	4	0	0	0	0	1	0	0	128	0	0	12	0	0	0	0	0	0	0	0	0	0	0	0	0
YU127	348	S_gun	C3	22.2529	-86.806	O75	0	0	0	0	0	0	2	0	0	0	0	6	0	0	0	0	0	0	0	0	0	4	0	3	0	0	304	0	0	0	0	0	0	0	0	8	0	0	0	11	0	0	0
YU128	349	S_gun	C5	22.2529	-86.806	O75	0	0	0	0	0	0	0	0	0	0	1	0	0	0	0	13	1	0	1	15	0	0	0	7	0	0	71	0	0	0	2	0	0	0	0	0	0	5	0	0	0	0	0
YU129	350	S_pap	C5	22.2529	-86.806	O75	0	0	0	0	0	0	0	0	0	0	21	14	0	0	0	0	0	0	5	0	0	0	0	0	0	0	1452	0	0	0	0	0	0	0	0	1	0	0	0	0	0	0	0
YU130	351	S_pap	C5	22.2529	-86.806	O75	0	0	0	0	0	0	11	2	0	0	3	15	0	0	0	14	2	0	3	0	0	1	0	10	0	0	101	1	0	0	6	0	0	0	0	0	0	0	0	0	0	0	0
YU131	352	S_pap	C5	22.2529	-86.806	O75	0	0	0	0	0	0	0	0	0	3	0	7	0	0	0	0	0	0	0	0	0	0	0	2	0	0	145	4	0	0	0	0	0	0	0	0	0	0	0	0	0	0	0
YU132	353	S_pap	C5	22.2529	-86.806	O75	0	0	0	0	0	0	0	0	0	0	0	22	0	0	0	0	42	0	6	0	0	0	0	0	0	0	67	0	0	3	0	0	0	0	0	0	0	0	0	0	0	0	0
YU133	354	S_pap	C5	22.2529	-86.806	O75	0	2	0	0	0	0	1	0	0	0	2	7	0	0	0	96	0	0	3	64	0	0	0	0	0	0	249	0	0	0	2	0	0	0	0	0	0	61	0	0	0	0	0
YU134	355	S_pap	C5	22.2529	-86.806	O75	0	0	0	0	0	0	0	0	0	0	3	17	0	0	0	0	0	0	0	0	0	0	0	0	0	0	0	1	0	0	0	0	0	0	0	0	0	0	0	0	0	0	2
YU135	356	S_pap	C5	22.2529	-86.806	O75	0	0	0	0	0	0	0	0	0	0	8	5	0	0	0	1	0	0	0	0	0	0	0	0	0	0	0	0	24	0	0	0	0	0	0	0	0	0	0	0	0	0	0
YU136	357	S_pap	C5	22.2529	-86.806	O75	0	0	1	0	0	0	0	0	0	0	0	4	0	0	0	0	1	0	1	0	0	0	0	0	0	0	204	0	0	0	1	0	0	0	0	0	0	0	0	0	0	0	0
YU137	358	S_pap	C5	22.2529	-86.806	O75	0	0	0	0	0	0	1	0	0	0	0	4	0	0	0	18	3	1	13	0	0	0	0	13	0	0	194	17	1	2	24	0	0	0	0	0	0	5	0	0	0	0	0
YU138	359	S_pap	C5	21.7826	-86.7006	P78	0	0	0	0	3	0	0	0	0	0	6	12	0	0	0	0	18	0	40	0	0	0	0	3	0	0	0	0	0	4	0	0	0	0	0	0	0	0	0	0	0	0	0
YU139	360	S_pap	C5	21.7826	-86.7006	P78	0	0	0	0	0	0	2	0	0	0	0	7	0	0	0	0	0	0	0	0	0	0	0	0	0	0	74	0	0	0	0	0	0	0	0	0	0	64	0	0	0	0	0
YU140	361	S_pap	C6	21.7826	-86.7006	P78	0	0	0	0	0	0	0	0	0	0	2	10	0	0	0	34	0	0	3	1	0	0	0	0	0	0	20	0	1	1	0	0	0	0	0	0	0	0	0	0	0	0	0
YU141	362	S_pap	C6	21.7826	-86.7006	P78	0	0	0	0	0	0	0	0	0	0	0	16	0	1	1	0	0	1	0	1	0	10	1	0	0	1	0	0	0	2	4	2	0	0	0	0	0	0	0	0	0	0	0
YU142	363	S_pap	C6	21.7826	-86.7006	P78	0	0	0	0	1	0	0	0	0	0	3	9	0	0	0	0	7	0	3	1	0	5	0	0	0	0	1	2	0	3	3	0	0	0	0	0	0	2	0	0	0	0	0
YU143	364	S_pap	C6	21.7826	-86.7006	P78	0	0	0	0	0	0	0	0	0	0	25	17	0	0	0	6	0	0	1	0	0	0	0	1	0	0	0	0	0	2	1	1	0	0	0	0	0	0	0	0	0	0	0
YU144	365	S_pap	C6	21.7826	-86.7006	P78	0	0	0	0	0	0	0	0	0	0	0	3	0	0	0	7	3	0	4	0	0	0	0	2	0	0	9	0	0	0	0	0	0	0	0	0	0	0	0	0	0	0	2
YU145	366	S_pap	C5	21.8877	-86.5911	P79	0	0	0	0	0	0	0	0	0	0	4	31	0	0	0	0	36	0	7	0	0	0	0	0	0	0	58	0	2	0	0	0	0	0	0	0	0	0	0	0	0	0	0
YU146	367	S_pap	C5	21.8877	-86.5911	P79	0	2	0	0	0	0	0	0	0	0	5	32	0	0	0	10	0	0	0	0	0	0	0	0	0	0	132	0	0	0	0	0	0	0	0	0	0	0	0	0	0	0	0
YU147	368	S_gun	C5	21.8877	-86.5911	P79	0	0	0	0	13	0	0	0	0	0	26	0	0	12	0	3	0	0	1	0	0	0	0	1	0	0	120	0	0	0	0	0	0	0	0	0	0	0	0	0	0	0	0
YU148	369	S_pap	C5	21.8877	-86.5911	P79	0	0	0	0	0	0	0	0	0	0	0	0	0	0	0	0	2	0	3	0	0	0	0	0	0	0	94	0	0	0	8	0	0	0	0	0	0	0	0	0	0	0	0
YU149	370	S_pap	C5	21.8877	-86.5911	P79	0	0	7	0	200	0	0	0	0	0	9	40	0	2	0	49	0	0	5	0	0	10	0	2	0	0	252	4	0	1	1	0	0	0	0	0	0	410	0	0	0	0	0
YU150	371	S_pap	C6	21.8877	-86.5911	P79	0	0	0	0	2	0	0	0	0	0	25	41	0	2	0	57	1	0	8	0	0	3	0	4	0	0	262	0	2	5	17	0	0	0	0	6	0	14	0	0	0	0	0
YU151	372	S_pap	C6	21.8877	-86.5911	P79	0	0	0	0	0	0	0	0	0	0	20	17	0	0	0	0	0	4	0	0	0	0	0	1	0	0	0	0	1	2	0	0	0	0	0	0	0	0	0	0	0	0	0
YU152	373	S_pap	C6	21.8877	-86.5911	P79	0	0	0	0	0	0	0	0	0	0	9	11	0	0	0	0	0	0	0	0	0	0	0	1	0	0	0	2	0	1	0	0	0	0	0	0	0	0	0	0	0	0	0
YU153	374	S_pap	C6	21.8877	-86.5911	P79	0	0	0	0	1	0	0	0	0	0	6	30	0	0	0	1	0	0	9	0	0	4	0	1	0	0	0	0	0	3	1	0	0	0	1	6	0	0	0	0	0	0	0
YU154	375	S_pap	C6	21.8877	-86.5911	P79	0	0	0	0	1	0	0	0	0	0	2	10	0	0	0	0	1	0	3	1	0	1	0	2	0	0	1	4	0	3	4	0	0	0	0	0	0	0	0	0	0	0	0
YU155	376	S_pap	C6	21.8877	-86.5911	P79	0	0	0	0	1	0	1	0	0	0	7	9	0	1	0	1	0	4	5	1	1	9	0	13	0	0	2	0	0	5	1	0	0	0	0	0	2	0	0	0	0	0	0
YU156	377	S_pap	C6	21.8877	-86.5911	P79	0	0	0	0	0	0	0	0	0	0	1	10	0	0	0	0	0	5	0	0	0	10	0	1	0	0	0	0	0	4	0	0	0	0	0	0	0	0	0	0	0	0	0
YU157	378	S_pap	C6	21.8877	-86.5911	P79	0	0	0	0	0	0	0	0	0	0	28	7	0	0	0	0	0	0	0	0	0	0	0	2	0	0	2	18	0	21	6	0	0	0	0	0	0	0	0	0	0	0	0
YU158	379	S_pap	C6	21.8877	-86.5911	P79	0	0	0	0	0	0	0	0	0	0	7	13	0	0	0	0	0	0	0	1	0	1	0	2	0	0	0	0	0	0	0	0	0	0	0	0	0	0	0	0	0	0	0
YU159	380	S_gun	C3	21.925	-86.5629	P80	0	0	2	0	0	127	0	0	0	0	0	0	0	0	0	0	3	0	1	0	0	0	0	0	0	0	126	0	0	0	0	0	0	0	0	0	0	0	0	32	1	0	0
YU160	381	S_pap	C5	21.925	-86.5629	P80	0	0	0	0	0	0	0	0	0	0	2	23	0	0	0	23	0	0	0	0	0	0	0	2	0	0	19	0	0	1	0	0	0	0	0	0	0	0	0	0	0	0	0
YU161	382	S_pap	C5	21.925	-86.5629	P80	0	0	0	0	0	0	0	0	0	0	6	64	0	0	0	0	0	0	0	0	0	0	0	0	0	0	623	0	0	0	0	0	0	0	0	0	0	0	0	0	0	0	0
YU162	383	S_pap	C5	21.925	-86.5629	P80	0	0	0	0	2	0	0	0	0	0	10	25	0	0	0	0	4	0	8	3	0	7	0	0	3	0	30	1	0	6	4	0	0	0	4	2	0	0	0	0	0	0	0
YU163	384	S_pap	C5	21.925	-86.5629	P80	0	0	0	0	0	0	1	0	0	0	13	20	0	0	0	23	0	0	2	0	0	8	0	0	0	0	258	0	0	0	0	0	0	0	0	0	0	0	0	0	0	0	0
YU164	385	S_pap	C5	21.925	-86.5629	P80	0	0	1	0	0	0	0	0	0	0	5	34	0	0	0	0	0	0	10	0	0	5	0	13	0	0	412	0	0	1	0	0	0	0	0	1	0	0	0	0	0	0	0
YU165	386	S_pap	C5	21.925	-86.5629	P80	0	0	0	0	0	0	0	0	0	0	2	20	0	0	0	18	0	0	0	0	0	0	0	0	0	0	587	0	0	6	0	0	0	0	0	0	0	0	0	0	0	0	0
YU166	387	S_pap	C5	21.925	-86.5629	P80	0	0	0	0	0	0	0	0	0	0	2	8	0	0	0	0	0	0	2	0	0	1	0	0	0	0	45	0	0	2	0	0	0	0	0	0	0	0	0	0	0	0	0
YU167	388	S_pap	C5	21.925	-86.5629	P80	0	0	0	0	0	0	0	0	0	0	1	5	0	0	0	1	0	0	1	1	0	0	0	1	0	0	120	0	0	1	0	0	0	0	0	0	0	0	0	0	0	0	0
YU168	389	S_pap	C6	21.925	-86.5629	P80	0	0	0	0	15	0	0	0	0	0	18	16	0	0	0	0	0	0	9	0	0	8	1	0	0	0	0	0	2	5	0	0	0	0	0	3	5	0	0	0	0	0	0
YU169	390	S_pap	C6	21.925	-86.5629	P80	0	0	0	0	0	0	1	0	0	0	93	31	0	0	0	0	0	0	24	0	0	2	0	0	0	0	23	0	1	0	0	0	0	0	0	0	0	0	0	0	0	0	0
YU170	391	S_pap	C6	21.925	-86.5629	P80	0	0	0	0	0	0	0	0	0	0	0	0	0	0	0	0	3	0	17	0	0	0	0	4	0	0	0	0	0	0	0	0	0	0	0	0	0	0	0	0	0	0	0
YU171	392	S_pap	C6	21.925	-86.5629	P80	0	0	0	0	0	43	0	0	0	0	17	33	0	0	0	0	2	0	17	0	0	14	0	2	0	0	50	0	2	0	0	0	0	0	0	3	0	0	0	0	0	0	0
YU172	393	S_pap	C6	21.925	-86.5629	P80	0	0	0	0	0	0	0	0	0	0	34	10	0	0	0	1	0	16	52	0	0	8	0	6	3	0	57	4	0	4	1	0	0	0	0	0	0	0	0	0	0	0	0
YU173	394	S_pap	C6	21.925	-86.5629	P80	0	0	0	0	0	0	0	0	0	0	17	12	0	0	0	0	0	0	13	0	0	10	0	1	0	0	23	0	2	21	0	0	0	0	0	1	0	0	0	0	0	0	0
YU174	395	S_pap	C6	21.925	-86.5629	P80	0	0	0	0	0	2	0	0	0	0	2	2	0	0	0	8	0	15	0	0	0	0	0	1	0	0	7	1	0	9	0	0	0	0	0	0	0	0	0	0	0	0	0
YU175	396	S_pap	C6	21.925	-86.5629	P80	0	0	0	0	0	0	0	0	0	0	1	11	0	0	0	0	0	0	10	0	0	0	0	7	0	0	0	0	0	4	0	0	0	0	0	0	1	0	0	0	0	0	0
YU176	397	S_pap	C6	21.925	-86.5629	P80	0	0	0	0	0	0	0	0	0	0	14	1	0	0	0	0	0	0	0	0	0	0	0	1	0	0	0	0	0	1	0	2	0	0	0	0	4	0	0	0	0	0	0
YU177	398	S_pap	C6	21.925	-86.5629	P80	0	0	0	0	0	0	0	0	0	0	2	3	0	0	0	72	0	0	5	0	0	1	0	2	0	0	10	0	0	0	0	0	0	0	0	0	1	0	0	0	0	0	0
[truncated: 36 more columns]
